# Supplementary material
Source: PubMed Central journal article supplement (PMC10065895)
Supplement: NIHMS1847972-supplement-MMC1.pdf [file NIHMS1847972-supplement-MMC1.pdf]

# THE LANCET

## Respiratory Medicine

### Supplementary appendix

This appendix formed part of the original submission and has been peer reviewed. We post it as supplied by the authors.

Supplement to: Mayer-Hamblett N, Ratjen F, Russell R, et al. Discontinuation versus continuation of hypertonic saline or dornase alfa in modulator treated people with cystic fibrosis (SIMPLIFY): results from two parallel, multicentre, open-label, randomised, controlled, non-inferiority trials. *Lancet Respir Med* 2022; published online Nov 4. [https://doi.org/10.1016/S2213-2600\(22\)00434-9](https://doi.org/10.1016/S2213-2600(22)00434-9).

## Supplementary Appendix

This appendix has been provided by the authors to give readers additional information about their work.

Nicole Mayer-Hamblett, Ph.D., Felix Ratjen, M.D., Renee Russell, M.S., Scott H. Donaldson, M.D., Kristin A. Riekert, Ph.D., Gregory S. Sawicki, M.D., Katherine Odem-Davis, Ph.D., Julia K. Young, M.Ed., Daniel Rosenbluth, M.D., Jennifer L. Taylor-Cousar, M.D., Christopher H. Goss, M.D., George Retsch-Bogart, M.D., John Paul Clancy, M.D., Alan Genatossio, Brian P. O'Sullivan, M.D., Ariel Berlinski, M.D., Susan L. Millard, M.D., Gregory Omlor, M.D., Colby A. Wyatt, M.D., Kathryn Moffett, M.D., David P. Nichols, M.D., Alex H. Gifford, M.D. on behalf of the SIMPLIFY Study Group

17  
18  
19  
20  
21

## Table of Contents

|                                         |           |
|-----------------------------------------|-----------|
| <b>List of the SIMPLIFY Study Group</b> | <b>3</b>  |
| <b>Supplementary Methods</b>            | <b>5</b>  |
| <b>Supplementary Results</b>            | <b>12</b> |
| <b>References</b>                       | <b>32</b> |

22 **List of the SIMPLFY Study Group**

23 CF Therapeutics Development Network Coordinating Center, Seattle Children's Research Institute: Margaret  
24 Kloster, Katie Weaver, Claire Chapdu, Jing Xie, Michelle Skalland, Melita Romasco, Sonya Heltshe, Noah Simon,  
25 Jill VanDalsen, Anna Mead, Rachael Buckingham, Kathy Seidel, Nikita Midamba, Laurel Couture, Brook Zappone  
26 Case, Wendy Au, Elsie Rockers, Amber Olander, Irene Bondick, Miya Johnson

27 Participating Sites - Site Investigators (SI) and Research Coordinators (RC):

28 Akron, OH CC and Peds – SI: Gregory Omlor; RC: Michelle Parrish; Anchorage, AK Providence Affiliate – SI:  
29 Dion Roberts; RC: Jillian Head; Ann Arbor, MI CC and Peds – SI: Lindsay Caverly; RC: Jessica Carey; Atlanta,  
30 GA Emory Adult, – SI: Rachel Linnemann; RC: Joy Dangerfield; Austin, TX CC and Peds – SI: Jason Fullmer; RC:  
31 Chelsea Roman; Baltimore, MD CC and Peds – SI: Peter Mogayzel; RC: Deanne Reyes; Billings, MT CC and Peds  
32 – SI: Jeremiah Lysinger; RC: Amy Harmala; Birmingham, AL Adult – SI: Isabel Virella-Lowell; RC: Johnathan  
33 Bergeron; Boise, ID CC and Peds – SI: Perry Brown; RC: Lejla Godusevic; Boston, MA CHB CC and Peds – SI:  
34 Alicia Casey; RC: Lauren Paquette; Burlington, VT Adult – SI: Thomas Lahiri; RC: Julie Sweet; Chapel Hill, NC  
35 CC and Peds – SI: Scott Donaldson; RC: Joshua Harris; Charleston, SC CC and Adult – Sylvia Szentpetery; RC:  
36 Shelia Parnell; Charlottesville, VA CC and Peds – SI: Deborah Froh; RC: Erica Tharrington; Chicago, IL  
37 Northwestern Adult – SI: Manu Jain; RC: Rachel Nelson; Cincinnati, OH CC and Peds – SI: Gary McPhail; RC:  
38 Sharon Kadon; Cleveland, OH Adult – SI: Kimberly McBennett; RC: Tia Rone; Cleveland, OH Cleveland Clinic  
39 Adult – SI: Elliott Dasenbrook; RC: Dave Weaver; Columbus, OH CC and Peds – SI: Karen McCoy; RC: Terri  
40 Johnson; Dallas, TX Southwestern Adult – SI: Raksha Jain; RC: Maria Mcleod; Dallas, TX Southwestern CC and  
41 Peds – SI: Preeti Sharma; RC: Mary Klosterman; Dayton, OH CC and Peds – SI: Gary Mueller; RC: Amy Jones;  
42 Denver, CO Adult – SI: Jennifer L. Taylor-Cousar; RC: Rachel Janney; Denver, CO CC and Peds – SI: Jordana  
43 Hoppe; RC: Mary Cross; Detroit, MI Adult – SI: Zubin Mukadam; RC: James Cahill; Ft. Worth, TX CC and Peds –  
44 SI: Karen Schultz; RC: Jill Finto; Gainesville, FL CC and Peds – SI: Silvia Delgado Villalta; RC: Alexa Smith;  
45 Grand Rapids, MI Helen DeVos CC and Peds – SI: Susan Millard; RC: Thomas Symington; Hershey, PA CC and  
46 Peds – SI: Gavin Graff; RC: Diane Kitch; Indianapolis, IN CC and Peds – SI: Don Sanders; RC: Misty Thompson;  
47 Iowa City, IA CC and Peds – SI: Tahuanty Pena; RC: Mary Teresi; Jacksonville, FL Nemours CC and Peds – SI:  
48 David Schaeffer; RC: Jennifer Gafford; Kansas City, KS Adult – SI: Deepika Polineni, Joel Mermis; RC: Lawrence  
49 Scott; Kansas City, MO CC – SI: Hugo Escobar; RC: Kristen Williams; Lebanon, NH Dartmouth-Hitchcock CC and  
50 Adult – SI: Brian O'Sullivan; RC: Dana Dorman; Lexington, KY CC and Peds – SI: Zoran Danov; RC: Ryan  
51 Bethay; Little Rock, AR CC and Peds – SI: Ariel Berlinski; RC: Kat Turbeville; Long Beach, CA Miller Childrens  
52 CC and Peds – SI: Jimmy Johannes; RC: Angelica Rodriguez; Long Branch, NJ Monmouth CC and Peds – SI:  
53 Robert Zanni; RC: Bridget Marra; Louisville, KY CC and Peds – SI: Ronald Morton; RC: Terri Simeon; Madison,  
54 WI Adult – SI: Andrew Braun; RC: Nicole Dondlinger; Milwaukee, WI Adult – SI: Julie Biller; RC: Erin Hubertz;  
55 Milwaukee, WI CC and Peds – SI: Nicholas Antos; RC: Laura Roth; Minneapolis, MN CC and Adult – SI: Joanne  
56 Billings; RC: Catherine Larson; Minneapolis, MN Children's CC – SI: John McNamara; RC: Priya Balaji;  
57 Morgantown, WV CC and Peds – SI: Kathryn Moffett; RC: Tammy Clark; Morristown, NJ Adult – SI: Rebecca  
58 Griffith; RC: Nancy Martinez; New Brunswick, NJ Adult – SI: Sabiha Hussain; RC: Halina Malveaux; New Haven,  
59 CT Yale CC and Peds – SI: Marie Egan; Catalina Guzman; New Hyde Park, NY Children's CC and Peds – SI: Joan  
60 DeCeglie-Germana; RC: Susan Galvin; New Orleans, LA Tulane CC and Peds – SI: Adrienne Savant; RC: Nicole  
61 Falgout; New York, NY Beth Israel Adult – SI: Patricia Walker; RC: Teresa Demarco; New York, NY Columbia  
62 Adult – SI: Emily DiMango; RC: Maria Ycaza; Orange, CA CC and Peds – SI: Pornchai Tirakitsoontorn; RC: Julie  
63 Ballo; Orlando, FL Central Florida Pulmonary Adult – SI: Daniel Layish; RC: Desiree Serr; Orlando, FL Nemours  
64 CC and Peds – SI: Floyd Livingston; RC: Sherry Wooldridge; Palo Alto, CA CC and Peds – SI: Carlos Milla; RC:  
65 Jacquelyn Spano; Pensacola, FL Nemours CC and Peds – SI: Okan Elidemir; RC: Rebecca Davis; Peoria, IL St  
66 Francis Adult – SI: Subramanyam Chittivelu; RC: Ashley Scott; Philadelphia, PA UPENN Adult – SI: Daniel  
67 Dorgan; RC: Sarah Alam; Pittsburgh, PA Adult – SI: Daniel Weiner; RC: Matt Butoryak; Portland, ME CC and  
68 Peds – SI: Colby Wyatt; RC: Harmony Renna; Portland, OR OHSU CC and Peds – SI: Anne Stone; RC: Brendan  
69 Klein; Richmond, VA CC and Peds – SI: Michael S. Schechter; RC: Meg Lessard; Rochester, NY CC and Peds –  
70 SI: Steven Scofield; RC: Barbara Johnson; Salt Lake City, UT CC and Peds – SI: Theodore Liou; RC: Jane Vroom;  
71 San Diego, CA CC and Peds – SI: Kathryn Akong; RC: Marissa Gil; San Francisco, CA Adult – SI: Jonathan  
72 Singer; RC: Legna Betancourt; San Francisco, CA CC and Peds – SI: Ngoc Ly; RC: Courtney Moreno; Seattle, WA  
73 Adult – SI: Moira Aitken; RC: Teresa Gambol; Seattle, WA CC and Peds – SI: Ronald Gibson; RC: Alan  
74 Genatossio; Spokane, WA Providence Peds – SI: Allison Lambert; RC: Joan Milton; St. Louis, MO WashU Adult –

75 SI: Daniel Rosenbluth; RC: Sarah Smith; St. Petersburg, FL CC and Peds – SI: Deanna Green; RC: Diane Hodge;  
76 Syracuse, NY CC and Peds – SI: Christopher Fortner; RC: Mary Forell; Tampa, FL Adult (Tampa General Hospital)  
77 – SI: Kapil Patel; RC: Rachel Karlnoski; Tucson, AZ CC and Peds – SI: Cori Daines; RC: Elizabeth Ryan; Tyler,  
78 TX Affiliate – SI: Rodolfo Amaro-Galvez; RC: Elizabeth Dohanich; Valhalla, NY NY Medical College CC and  
79 Peds – SI: Alison Lennox; RC: Zachary Messer; Winston-Salem, NC Wake Forest Adult – SI: Holly Hanes; RC:  
80 Kay Powell

81

82

83

84 **Supplementary Methods**

85 *Study Design*

86 Additional study design details have been previously published<sup>1</sup> and are also available in the accompanying  
87 protocol.

88  
89 The SIMPLIFY Study comprises two identical randomized, controlled open label two-arm trials consisting of a two-  
90 week screening period, randomization to either continue or discontinue hypertonic saline (HS, Trial A) or dornase  
91 alfa (DA, Trial B), followed by a 6-week study period (Figure S1). Visits occurred at weeks -2 (Screening), 0, 2, and  
92 6. Only those that maintained adequate reported adherence to inhaled drug therapy between Screening (Week -2)  
93 and Week 0 were eligible for randomization (Table S1). At Week 0, participants currently being treated with only  
94 HS or DA were enrolled in Trial A or Trial B (as applicable) and randomized 1:1 to either continue or discontinue  
95 their current prescribed therapy. At trial entry, participants currently being treated with both HS and DA remained  
96 on both therapies during the screening period and were first randomized to Trial A (HS) or Trial B (DA) as well as  
97 randomized (1:1) to continue vs. discontinue the applicable therapy. After completion of the first trial, these  
98 participants subsequently could enroll in the alternative trial if they met eligibility criteria, with no time limitation  
99 between trials. Re-enrolling participants did not need to remain on the treatment regimen assigned in the first trial  
100 but had to meet all eligibility criteria regarding treatment stability prior to entry (Table S1).

101  
102 Within each trial, randomization was stratified by Week 0 ppFEV<sub>1</sub> ( $\geq 90$ ,  $< 90$ ), treatment combination at screening  
103 (single or concurrent use of HS and/or DA), prior trial participation (yes/no), and age ( $\geq 18$  vs  $< 18$ ). For participants  
104 randomly assigned to continue their therapy during a given trial, this therapy was expected to be taken at least once  
105 daily according to each participant's pre-existing, clinically prescribed regimen (e.g., daily, twice daily). The  
106 concentration of HS was according to clinical prescription with minimum required concentration 3%. All  
107 participants were maintained on the same medications (and airway clearance routines) throughout the entire study  
108 period (i.e., Screening Visit through Week 6), as medically feasible, with no introduction of new chronic therapies  
109 or discontinuation of current chronic therapies except those outlined in the protocol (HS or DA).

110

111

112 **Figure S1.** SIMPLIFY Study Design Schematic. Reprinted with permission of the American Thoracic Society.  
 113 Copyright © 2022 American Thoracic Society.<sup>1</sup> All rights reserved. Annals of the American Thoracic Society is an  
 114 official journal of the American Thoracic Society.

115

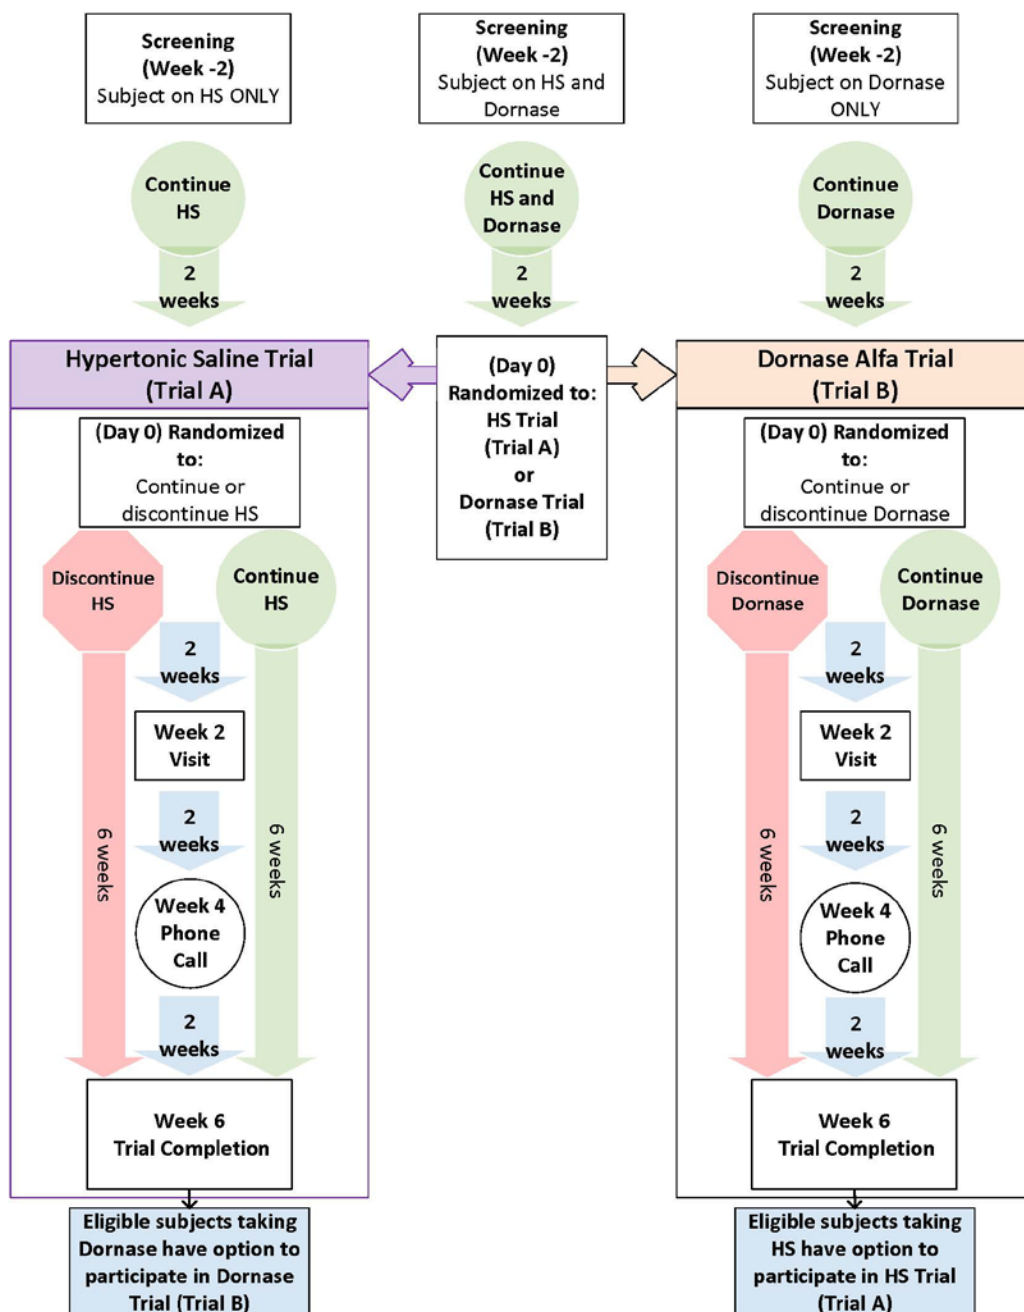

116

117

118 *Eligibility*

119 **Table S1.** Eligibility Criteria for SIMPLIFY.

| <b>Eligibility Criteria at Screening (Week -2)</b>                                                                                                                                                                                                                                                                                                                                                                                                                                                                                                                                                                                                                                                                                                                                                                                                                                                                                                                                                                                                                                                                                                                                                                                                                                                           |
|--------------------------------------------------------------------------------------------------------------------------------------------------------------------------------------------------------------------------------------------------------------------------------------------------------------------------------------------------------------------------------------------------------------------------------------------------------------------------------------------------------------------------------------------------------------------------------------------------------------------------------------------------------------------------------------------------------------------------------------------------------------------------------------------------------------------------------------------------------------------------------------------------------------------------------------------------------------------------------------------------------------------------------------------------------------------------------------------------------------------------------------------------------------------------------------------------------------------------------------------------------------------------------------------------------------|
| Eligibility criteria will be evaluated at the Screening visit (Week -2) for each trial in the protocol. Participants that enter the SIMPLIFY Protocol taking only hypertonic saline or only dornase alfa at the time of entry will only be eligible to participate in one trial.                                                                                                                                                                                                                                                                                                                                                                                                                                                                                                                                                                                                                                                                                                                                                                                                                                                                                                                                                                                                                             |
| <b>Consent</b>                                                                                                                                                                                                                                                                                                                                                                                                                                                                                                                                                                                                                                                                                                                                                                                                                                                                                                                                                                                                                                                                                                                                                                                                                                                                                               |
| A. Written informed consent (and assent when applicable) obtained from participant or participant's legal guardian.<br>B. Enrolled in the CF Patient Registry.<br>C. For the 6-week trial duration, willingness to either continue or discontinue daily use of hypertonic saline or dornase alfa (as applicable to Trial A or Trial B) based on randomization and according to the clinically prescribed routine (i.e., at least once daily).<br>D. Is willing and able to adhere to the study visit schedule and other protocol requirements including willingness and ability to provide information using electronic questionnaires loaded onto a personal device (e.g., smartphone or tablet).<br>E. For participants who enter the SIMPLIFY Protocol taking both hypertonic saline and dornase alfa at the time of entry into their first trial: Willingness to be randomized to either Trial A or Trial B.                                                                                                                                                                                                                                                                                                                                                                                             |
| <b>Demographics</b>                                                                                                                                                                                                                                                                                                                                                                                                                                                                                                                                                                                                                                                                                                                                                                                                                                                                                                                                                                                                                                                                                                                                                                                                                                                                                          |
| A. Age $\geq$ 12 years at the Screening Visit.                                                                                                                                                                                                                                                                                                                                                                                                                                                                                                                                                                                                                                                                                                                                                                                                                                                                                                                                                                                                                                                                                                                                                                                                                                                               |
| <b>Disease History</b>                                                                                                                                                                                                                                                                                                                                                                                                                                                                                                                                                                                                                                                                                                                                                                                                                                                                                                                                                                                                                                                                                                                                                                                                                                                                                       |
| B. Diagnosis of CF.<br>C. Forced expiratory volume in 1 second (FEV <sub>1</sub> ) $\geq$ 70 % predicted at the Screening Visit if < 18 years old, and $\geq$ 60 % predicted at Screening Visit if $\geq$ 18 years old.<br>D. After interim analysis, if DMC approves, a separate cohort (lower lung function cohort) of approximately 120 participants $\geq$ 18 years old with FEV <sub>1</sub> % predicted 40 to < 60 % predicted will be enrolled as a separate cohort into Trial A.<br>E. Clinically stable with no significant changes in health status within the 7 days prior to and including the Screening Visit.<br>F. No active smoking or vaping.<br>G. Has no other conditions that, in the opinion of the Site Investigator/designee, would preclude informed consent or assent, make study participation unsafe, complicate interpretation of study outcome data, or otherwise interfere with achieving the study objectives.                                                                                                                                                                                                                                                                                                                                                                |
| <b>Concomitant Medications and Treatments</b>                                                                                                                                                                                                                                                                                                                                                                                                                                                                                                                                                                                                                                                                                                                                                                                                                                                                                                                                                                                                                                                                                                                                                                                                                                                                |
| H. Current treatment with elexacaftor/tezacaftor/ivacaftor (ETI) for at least the 90 days prior to and including the Screening Visit and willing to continue daily use for the duration of the study.<br>I. Currently taking hypertonic saline (at least 3%) and/or dornase alfa for at least the 90 days prior to and including the Screening Visit and willing to continue daily use for the 2-week screening period. *<br>J. Ability to tolerate albuterol or levalbuterol (Xopenex).<br>K. No use of an investigational drug within 28 days prior to and including the Screening Visit.<br>E. No changes to chronic therapy (e.g., ibuprofen, azithromycin, inhaled tobramycin, aztreonam lysine) within 28 days prior to and including the Screening Visit. This includes new airway clearance routines.<br>F. No acute use of antibiotics (oral, inhaled or IV) or acute use of systemic corticosteroids for respiratory tract symptoms within 7 days prior to and including the Screening Visit.<br>G. No chronic use of systemic corticosteroids at a dose equivalent to $\geq$ 10mg per day of prednisone within 28 days prior to and including the Screening Visit.<br>H. No antibiotic treatment for nontuberculous mycobacteria (NTM) within 28 days prior to and including the Screening Visit. |
| <b>Eligibility Criteria at Randomization (Week 0)</b>                                                                                                                                                                                                                                                                                                                                                                                                                                                                                                                                                                                                                                                                                                                                                                                                                                                                                                                                                                                                                                                                                                                                                                                                                                                        |
| Eligibility criteria will be evaluated prior to randomization at Visit 1 (Week 0) for each trial.                                                                                                                                                                                                                                                                                                                                                                                                                                                                                                                                                                                                                                                                                                                                                                                                                                                                                                                                                                                                                                                                                                                                                                                                            |



---

**Consent**

---

I. Is willing and able to adhere to the study visit schedule and other protocol requirements.

---

**Disease History**

---

J. No absolute decrease in FEV<sub>1</sub> % predicted of  $\geq 10\%$  between the Screening Visit and Visit 1 (Week 0).

K. Clinically stable with no significant changes in health status between the Screening Visit and Visit 1 (Week 0).

---

**Concomitant Medications and Treatments**

---

L. No acute use of antibiotics (oral, inhaled or IV) or acute use of systemic corticosteroids for respiratory tract symptoms from the Screening Visit to Visit 1 (Week 0).

M. More than 70% compliance with submission of daily ePRO questionnaires in the up to 13 days prior to Visit 1 (Week 0).

N. Among the daily ePRO questionnaires submitted in the up to 13 days prior to Visit 1, at least 70% adherence with taking ETI and as applicable, hypertonic saline and/or dornase alfa, as reported from Screening to Visit 1 (Week 0).

---

120 \*For participants with prior participation in SIMPLIFY, participants must continue with assigned use/non-use of  
121 therapy in the prior trial or re-establish consistent hypertonic saline and/or dornase alfa therapy prior to entering into  
122 the second study. There are no time constraints for re-entering.

123

124 Multiple Breath Washout

125 LCI was determined by nitrogen multiple breath washout (N<sub>2</sub> MBW) according to a standard operating procedure  
126 (SOP) using an open circuit, bias flow system (Exhalyzer D®, EcoMedics AG, and Duernten, Switzerland) and  
127 collected in device specific software (Spiroware® 3.1 EcoMedics AG). All operators underwent MBW training at  
128 the North American MBW core facility in Toronto and were certified for MBW testing prior to study initiation.  
129 Participants performed MBW testing in triplicate while watching a video. LCI was defined as the number of lung  
130 volume (functional residual capacity) turnovers needed to clear the tracer gas to 1/40<sup>th</sup> of its starting concentration.  
131 MBW measurements were transmitted electronically to the Hospital for Sick Children MBW Center via a secure  
132 connection for centralized over-reading of the data and analysed using software version 3.3.1 to correct for the  
133 previously reported sensor error.<sup>2</sup> Measurements were deemed acceptable when at least 2 measurements per test  
134 occasions met quality control criteria.<sup>3</sup>

135 Blinding and Randomization

136 Although there was no masking to treatment assignment for individual participants or their clinicians, aggregate study  
137 results were blinded and tightly controlled by the TDN data coordinating center. Eligible participants in each trial  
138 were randomized 1:1 to continue or discontinue therapy using permuted blocks of varying size, stratified by Week 0  
139 ppFEV<sub>1</sub> ( $\geq 90$ ,  $< 90$ ), treatment combination at screening (single or concurrent use of HS and/or DA), prior study  
140 participation (yes/no), and age ( $\geq 18$  vs  $< 18$ ). Randomization occurred centrally using the Medidata Rave® RTSM  
141 system, a web-based randomization system with randomly generated treatment assignment lists derived for each trial  
142 strata by the TDN Coordinating Center and linked to the Medidata Rave® electronic data capture (EDC) system.  
143 Only authorized site personnel were given access to the randomization module in EDC. Authorized site personnel  
144 entered participant eligibility information and whether or not the participant signed informed consent. If the  
145 information entered into the EDC system was consistent with eligibility criteria for the study, the system provided  
146 the appropriate authorized site personnel with a randomization assignment for that participant that matched a  
147 specific treatment arm.

148 Data Quality

149 Data Quality  
150  
151 After data have been entered into the study database, data validation checks were applied on a regular  
152 basis. Queries were entered, tracked, and resolved through the EDC system directly. The study database  
153 was updated in accordance with the resolved queries. All changes to the study database were  
154 documented in an audit trail. Study monitoring was conducted to assess adherence to the protocol, provide site  
155 training, and assess data quality via select source document verification. All procedures for the handling and  
156 analysis of data are conducted using good computing practices for the handling and analysis of data for clinical  
157 trials.

158 Statistical Analysis

159 Statistical Analysis  
160 A detailed Statistical Analysis Plan (SAP) was developed and finalized prior to the analysis of study data. Trials  
161 were independently analyzed. The SAP outlines all modifications to the analysis plan that deviate from the protocol.

162 For the purposes of analysis, baseline is defined as Visit 1 (Day 0), unless otherwise specified. All estimates of  
163 differences between treatment groups are reported with corresponding 95% confidence intervals from ANOVA  
164 models adjusted for randomization strata. Corresponding within-arm estimates of change are least-squares means  
165 (LS means, also called estimated marginal means) with weighting proportional to randomization strata frequencies  
166 in the corresponding analysis population. The per-protocol (PP) population was used for the primary efficacy  
167 analyses, defined in the SAP by criteria including  $\geq 70\%$  adherence to the assigned treatment regimen post-  
168 randomization and no *a priori* defined major protocol deviations impacting the primary analysis, with criteria as  
169 below:

- 170  
171 1. Daily diary completion (“Compliance”)  
172 a.  $\geq 70\%$  non-missing data  
173 b.  $\geq 70\%$  non-missing in last 13 days  
174 2. Daily diary responses aligned with randomized treatment (“Adherence”)  
175 a. to assigned treatment regimen (HS or DA) among non-missing days overall ( $\geq 70\%$ )

- 176           b. to assigned treatment regimen (HS or DA) among non-missing days in last 13 days ( $\geq 70\%$ )
- 177           3. No initiation of new acute oral, inhaled, or IV antibiotics for respiratory symptoms
- 178           4. Non-missing FEV at Visit 3 (week 6)
- 179           5. Given the correct randomization instructions
- 180           6. Minimum 70% use of ETI among non-missing days in last 13 days
- 181           7. Randomized but determined to be ineligible

182 Participants could meet more than one criterion for exclusion from the PP population. For participants with multiple  
183 PP exclusions, the primary reason included in Figure 1 was determined by chronological order (ie. using the  
184 sequence of events in the study). The PP population was used to test for non-inferiority with the intent that this  
185 analysis population would result in a more conservative treatment effect (e.g., showing a more *negative* effect with  
186 discontinuation) by assuring a population with distinct treatment patterns for which to measure a difference.  
187 Sensitivity analyses of the primary and secondary efficacy endpoints were performed on the intent to treat (ITT)  
188 population defined as all subjects randomized at Visit 1 (Day 0). Pre-defined subgroup analyses including  
189 randomization factors and evaluating age group, sex at birth, genotype, *Pseudomonas aeruginosa* status, and  
190 concurrent use of airway clearance therapy were conducted. . Additional subgroup analyses were considered  
191 exploratory.

192 A non-inferiority margin of -3% for the difference between arms in the 6-week change in ppFEV<sub>1</sub> was established *a*  
193 *priori* with community input and clinical consensus during scientific review of the protocol.<sup>1</sup> Establishment of a NI  
194 margin in the context of this study weighted community input about an important reduction in ppFEV<sub>1</sub> that would  
195 suggest clear negative impact of discontinuation of therapy, given the inexistence of data about the clinical  
196 effectiveness of either DA or HS in modulator treated people with CF.

197 The primary approach to handling missing data was through careful study conduct to prevent loss to follow-up and  
198 obtain endpoint data for participants who withdrew from the study.<sup>4</sup> Missing outcome data in the ITT population for  
199 additional sensitivity analyses of the primary endpoint and for key secondary endpoints (CRISS, CFQ-R, and LCI)  
200 were imputed using the least favorable treatment mean in arms discontinuing treatment and the most favorable  
201 treatment mean in arms continuing treatment. In this case, the least (most) favorable treatment mean is defined as  
202 the mean of the arm with the greater negative (positive) change from randomization to Week 6. This modification  
203 to the control-based mean imputation<sup>5</sup> was pre-specified to assess sensitivity to the missing at random assumption  
204 (MAR) under the non-inferiority design. Complete case results in the ITT population, including participants based  
205 on availability of non-missing values, are also reported.

206 To aid in the monitoring of safety, for each trial, the scheduled review following enrollment of 25% and 50% for  
207 that trial included a formal evaluation of excess harm as measured by the 6-week change in ppFEV<sub>1</sub>. In these  
208 reviews, the Data Monitoring Committee (DMC) was guided by interim boundaries pre-specified to test for excess  
209 harm. For the purposes of each trial in the SIMPLIFY study, excess harm was defined at interim evaluations as a  
210 difference between treatment groups in the 6-week change in ppFEV<sub>1</sub> for which the upper bound of the associated  
211 CI excluded a pre-defined margin of -1.5% (e.g. representing a small and clinically negligible negative effect of  
212 withdrawal). This smaller margin was selected for interim monitoring in order to allow for detection of harm near  
213 the boundary below the pre-defined NI margin, -3%. The interim evaluations for excess harm during each study  
214 were performed using the ITT safety population with Pocock alpha spending adjustment for group sequential  
215 testing, a one-sided alpha of 0.025, common standard deviation of 8.4%, and total ITT sample size of 350 allowing  
216 for up to 12% attrition from the 400 enrolled. These interim evaluations for excess harm with non-binding stopping  
217 rules did not require multiplicity adjustment to control the alpha level of 0.025 for the final test of non-inferiority  
218 and had negligible impact on power under the alternative of no difference.

219 All analyses were performed using SAS (SAS Institute Inc, Cary, NC, 2020) version 9.4), and R (version 4.0.3).<sup>6</sup>

## 220 SIMPLIFY Enrollment Progression

221 In October 2021, the DA trial achieved goal enrollment but was given DMC approval to over-enroll in order to  
222 increase data collection of the LCI secondary endpoint, initially impacted by COVID-19 site restrictions. Rather  
223 than closing the DA trial, per DMC approval and as permitted in study consent, the study level randomization  
224 allocation was altered from 1:1 randomization to subsequently weight randomization of participants on both  
225 therapies to the HS trial. By Spring 2022, overall study enrollment was demonstrating increasingly slow enrollment

226 reflecting both surges in the COVID-19 pandemic and limited remaining eligible patient population to recruit amidst  
227 other competing trials and accounting for individuals with CF who had already altered use of the trial therapies. A  
228 planned mid-study assessment of the overall (pooled) estimates of the standard deviation of the primary endpoint,  
229 the 6-week change in ppFEV<sub>1</sub>, demonstrated a significantly lower value than included in sample size calculations  
230 (<6 as compared to the assumed standard deviation of 8). Thus, ending enrollment for the HS trial just under the  
231 original target of 400 participants (with approximately 300 expected in the PP population) was not anticipated to  
232 impact study power. Thus, the SIMPLIFY study was closed to enrollment in May 2022 based on feasibility of  
233 completing original enrollment targets.

234

235

236 **Supplementary Results**

237 **Table S2.** Overview of compliance to medication reporting and treatment regimen adherence.

|                                                           | Hypertonic Saline (HS) Trial |                      | Dornase Alfa (DA) Trial |                      |
|-----------------------------------------------------------|------------------------------|----------------------|-------------------------|----------------------|
|                                                           | Continue<br>N=186            | Discontinue<br>N=184 | Continue<br>N=237       | Discontinue<br>N=240 |
| Daily Medication Use Reporting (Compliance), %            |                              |                      |                         |                      |
| N                                                         | 186                          | 184                  | 237                     | 240                  |
| Mean (SD)                                                 | 88.3 (15.02)                 | 91.2 (11.21)         | 91.2 (12.26)            | 91.6 (13.43)         |
| ≥70% Compliance, n (%) *                                  | 150 (80.6%)                  | 153 (83.2%)          | 208 (87.8%)             | 214 (89.2%)          |
| Reported Adherence to Assigned Regimen, % †               |                              |                      |                         |                      |
| N                                                         | 186                          | 184                  | 237                     | 240                  |
| Mean (SD)                                                 | 98.1 (6.37)                  | 96.1 (14.05)         | 96.3 (9.66)             | 97.4 (9.75)          |
| ≥70% Adherence, n (%) *                                   | 178 (95.7%)                  | 175 (95.1%)          | 224 (94.5%)             | 228 (95.0%)          |
| Reported Adherence to ETI, %                              |                              |                      |                         |                      |
| N                                                         | 186                          | 184                  | 237                     | 240                  |
| Mean (SD)                                                 | 99.6 (1.74)                  | 99.3 (2.73)          | 99.4 (2.58)             | 99.5 (2.10)          |
| Reported Adherence to Other Inhaled Therapy (if using), % |                              |                      |                         |                      |
| N                                                         | 156                          | 154                  | 147                     | 148                  |
| Mean (SD)                                                 | 97.5 (6.09)                  | 98.7 (3.76)          | 96.4 (10.92)            | 98.5 (4.55)          |
| Reported Adherence to ACT (if using), %                   |                              |                      |                         |                      |
| N                                                         | 178                          | 174                  | 228                     | 226                  |
| Mean (SD)                                                 | 95.9 (14.43)                 | 96.0 (15.71)         | 93.5 (19.10)            | 94.2 (18.51)         |

238 \* Met ≥70% in both the overall study period (Week 0 to Week 6) and in the last two weeks prior to Week 6.  
 239 † Adherence for each participant is defined as Y/X, multiplied by 100, where X is the number of days participant reported on daily  
 240 medication use and Y is the number of days participant reported following treatment assignment.  
 241  
 242

243 **Table S3.** Baseline and clinical characteristics comparing the ITT and PP populations in the HS trial.

|                                                   | ITT Population    |                      | PP Population     |                      |
|---------------------------------------------------|-------------------|----------------------|-------------------|----------------------|
|                                                   | Continue<br>N=186 | Discontinue<br>N=184 | Continue<br>N=140 | Discontinue<br>N=133 |
| <b>Sex at Birth</b>                               |                   |                      |                   |                      |
| Male                                              | 99 (53.2%)        | 97 (52.7%)           | 77 (55.0%)        | 68 (51.1%)           |
| Female                                            | 87 (46.8%)        | 87 (47.3%)           | 63 (45.0%)        | 65 (48.9%)           |
| <b>Age (years)</b>                                |                   |                      |                   |                      |
| N                                                 | 186               | 184                  | 140               | 133                  |
| Mean (SD)                                         | 22.4 (10.73)      | 21.7 (10.28)         | 23.5 (11.34)      | 21.8 (11.06)         |
| <b>Age Distribution</b>                           |                   |                      |                   |                      |
| ≥12 to <18                                        | 92 (49.5%)        | 90 (48.9%)           | 64 (45.7%)        | 68 (51.1%)           |
| ≥18 to <24                                        | 39 (21.0%)        | 37 (20.1%)           | 28 (20.0%)        | 24 (18.0%)           |
| ≥24 to <30                                        | 18 (9.7%)         | 32 (17.4%)           | 15 (10.7%)        | 22 (16.5%)           |
| ≥30                                               | 37 (19.9%)        | 25 (13.6%)           | 33 (23.6%)        | 19 (14.3%)           |
| <b>Race</b>                                       |                   |                      |                   |                      |
| White                                             | 182 (97.8%)       | 176 (95.7%)          | 136 (97.1%)       | 128 (96.2%)          |
| Black or African American                         | 1 (0.5%)          | 2 (1.1%)             | 1 (0.7%)          | 2 (1.5%)             |
| Asian                                             | 0 (0%)            | 1 (0.5%)             | 0 (0%)            | 0 (0%)               |
| American Indian or Alaskan Native                 | 0 (0%)            | 0 (0%)               | 0 (0%)            | 0 (0%)               |
| Native Hawaiian or Other Pacific Islander         | 0 (0%)            | 0 (0%)               | 0 (0%)            | 0 (0%)               |
| Other/Unknown*                                    | 3 (1.6%)          | 5 (2.7%)             | 3 (2.1%)          | 3 (2.3%)             |
| <b>Ethnicity</b>                                  |                   |                      |                   |                      |
| Hispanic or Latino                                | 6 (3.2%)          | 14 (7.6%)            | 6 (4.3%)          | 11 (8.3%)            |
| Not Hispanic or Latino                            | 180 (96.8%)       | 170 (92.4%)          | 134 (95.7%)       | 122 (91.7%)          |
| <b>Genotype Group</b>                             |                   |                      |                   |                      |
| F508del Homozygous                                | 111 (59.7%)       | 111 (60.3%)          | 84 (60.0%)        | 82 (61.7%)           |
| F508del Heterozygous                              | 72 (38.7%)        | 71 (38.6%)           | 53 (37.9%)        | 51 (38.3%)           |
| Other/Unknown                                     | 3 (1.6%)          | 2 (1.1%)             | 3 (2.1%)          | 0 (0%)               |
| <b>FEV<sub>1</sub> (% predicted)</b>              |                   |                      |                   |                      |
| N                                                 | 186               | 184                  | 140               | 133                  |
| Mean (SD)                                         | 97.2 (16.50)      | 96.7 (17.17)         | 96.8 (17.30)      | 97.6 (17.55)         |
| <b>FEV<sub>1</sub> (% predicted) Distribution</b> |                   |                      |                   |                      |
| <60                                               | 1 (0.5%)          | 1 (0.5%)             | 1 (0.7%)          | 1 (0.8%)             |
| ≥60 to <70                                        | 10 (5.4%)         | 13 (7.1%)            | 10 (7.1%)         | 9 (6.8%)             |
| ≥70 to <90                                        | 53 (28.5%)        | 46 (25.0%)           | 37 (26.4%)        | 32 (24.1%)           |
| ≥90 to <100                                       | 33 (17.7%)        | 45 (24.5%)           | 26 (18.6%)        | 31 (23.3%)           |
| ≥100                                              | 89 (47.8%)        | 79 (42.9%)           | 66 (47.1%)        | 60 (45.1%)           |
| <b>LCl<sub>2.5</sub> †</b>                        |                   |                      |                   |                      |
| N                                                 | 47                | 52                   | 33                | 33                   |
| Mean (SD)                                         | 7.8 (2.15)        | 8.2 (2.56)           | 7.8 (2.37)        | 8.1 (2.59)           |

|                                                    | ITT Population    |                      | PP Population     |                      |
|----------------------------------------------------|-------------------|----------------------|-------------------|----------------------|
|                                                    | Continue<br>N=186 | Discontinue<br>N=184 | Continue<br>N=140 | Discontinue<br>N=133 |
| <b>Prior Study Enrollee</b>                        | 62 (33.3%)        | 62 (33.7%)           | 45 (32.1%)        | 42 (31.6%)           |
| <b>Current Chronic Therapy</b>                     |                   |                      |                   |                      |
| DA                                                 | 156 (83.9%)       | 154 (83.7%)          | 120 (85.7%)       | 111 (83.5%)          |
| HS                                                 | 186 (100%)        | 184 (100%)           | 140 (100%)        | 133 (100%)           |
| ETI                                                | 186 (100%)        | 184 (100%)           | 140 (100%)        | 133 (100%)           |
| Airway clearance                                   | 178 (95.7%)       | 174 (94.6%)          | 132 (94.3%)       | 127 (95.5%)          |
| Inhaled antibiotic (Continuous)                    | 7 (3.8%)          | 2 (1.1%)             | 4 (2.9%)          | 0 (0%)               |
| Inhaled antibiotic (Cycled)                        | 51 (27.4%)        | 43 (23.4%)           | 41 (29.3%)        | 32 (24.1%)           |
| Inhaled antibiotic (Continuous Alternating)        | 17 (9.1%)         | 15 (8.2%)            | 12 (8.6%)         | 11 (8.3%)            |
| Oral antibiotic                                    | 85 (45.7%)        | 81 (44.0%)           | 65 (46.4%)        | 58 (43.6%)           |
| Ibuprofen                                          | 8 (4.3%)          | 15 (8.2%)            | 8 (5.7%)          | 11 (8.3%)            |
| Systemic steroids                                  | 1 (0.5%)          | 2 (1.1%)             | 1 (0.7%)          | 1 (0.8%)             |
| <b>Previous Modulator Use †</b>                    |                   |                      |                   |                      |
| Ivacaftor                                          | 8 (4.3%)          | 1 (0.5%)             | 6 (4.3%)          | 1 (0.8%)             |
| Lumacaftor/Ivacaftor                               | 49 (26.3%)        | 54 (29.3%)           | 36 (25.7%)        | 37 (27.8%)           |
| Tezacaftor/Ivacaftor                               | 45 (24.2%)        | 43 (23.4%)           | 32 (22.9%)        | 29 (21.8%)           |
| <b>Positive Microbiology Culture (past year) §</b> |                   |                      |                   |                      |
| Pseudomonas aeruginosa                             | 57 (30.6%)        | 39 (21.2%)           | 43 (30.7%)        | 31 (23.3%)           |
| Staphylococcus aureus                              | 118 (63.4%)       | 137 (74.5%)          | 89 (63.6%)        | 105 (78.9%)          |
| Methicillin-resistant staphylococcus aureus        | 34 (18.3%)        | 40 (21.7%)           | 26 (18.6%)        | 26 (19.5%)           |
| Stenotrophomonas maltophilia                       | 9 (4.8%)          | 11 (6.0%)            | 8 (5.7%)          | 9 (6.8%)             |
| Achromobacter xylosoxidans                         | 1 (0.5%)          | 2 (1.1%)             | 0 (0%)            | 1 (0.8%)             |
| Burkholderia cepacia complex                       | 3 (1.6%)          | 2 (1.1%)             | 2 (1.4%)          | 1 (0.8%)             |
| Haemophilus influenzae                             | 9 (4.8%)          | 5 (2.7%)             | 6 (4.3%)          | 2 (1.5%)             |
| Mycobacterium abscessus                            | 2 (1.1%)          | 1 (0.5%)             | 1 (0.7%)          | 0 (0%)               |
| Mycobacterium avium complex                        | 1 (0.5%)          | 3 (1.6%)             | 0 (0%)            | 0 (0%)               |

244 Data are mean (SD) or n (%). Percentages may not sum to 100 in each category due to rounding.

245 \*Other includes participants of more than one race.

246 † LCI result could be obtained at either the Week -2 or Week 0 Visit.

247 ‡ Participants may fall into more than one category of prior modulator use.

248 § Culture results obtained clinically within 12 months prior to screening.

249

250 **Table S4.** Baseline and clinical characteristics comparing the ITT and PP populations in the DA trial.

|                                                   | ITT Population    |                      | PP Population     |                      |
|---------------------------------------------------|-------------------|----------------------|-------------------|----------------------|
|                                                   | Continue<br>N=237 | Discontinue<br>N=240 | Continue<br>N=193 | Discontinue<br>N=199 |
| <b>Sex at Birth</b>                               |                   |                      |                   |                      |
| Male                                              | 117 (49.4%)       | 127 (52.9%)          | 96 (49.7%)        | 101 (50.8%)          |
| Female                                            | 120 (50.6%)       | 113 (47.1%)          | 97 (50.3%)        | 98 (49.2%)           |
| <b>Age (years)</b>                                |                   |                      |                   |                      |
| N                                                 | 237               | 240                  | 193               | 199                  |
| Mean (SD)                                         | 23.2 (11.50)      | 21.9 (9.19)          | 23.7 (11.83)      | 22.1 (9.39)          |
| <b>Age Distribution</b>                           |                   |                      |                   |                      |
| ≥12 to <18                                        | 108 (45.6%)       | 110 (45.8%)          | 85 (44.0%)        | 89 (44.7%)           |
| ≥18 to <24                                        | 48 (20.3%)        | 51 (21.3%)           | 36 (18.7%)        | 45 (22.6%)           |
| ≥24 to <30                                        | 31 (13.1%)        | 32 (13.3%)           | 27 (14.0%)        | 25 (12.6%)           |
| ≥30                                               | 50 (21.1%)        | 47 (19.6%)           | 45 (23.3%)        | 40 (20.1%)           |
| <b>Race</b>                                       |                   |                      |                   |                      |
| White                                             | 227 (95.8%)       | 231 (96.3%)          | 187 (96.9%)       | 192 (96.5%)          |
| Black or African American                         | 4 (1.7%)          | 1 (0.4%)             | 3 (1.6%)          | 1 (0.5%)             |
| Asian                                             | 1 (0.4%)          | 0 (0%)               | 1 (0.5%)          | 0 (0%)               |
| American Indian or Alaskan Native                 | 0 (0%)            | 1 (0.4%)             | 0 (0%)            | 1 (0.5%)             |
| Native Hawaiian or Other Pacific Islander         | 0 (0%)            | 0 (0%)               | 0 (0%)            | 0 (0%)               |
| Other/Unknown*                                    | 5 (2.1%)          | 7 (2.9%)             | 2 (1.0%)          | 5 (2.5%)             |
| <b>Ethnicity</b>                                  |                   |                      |                   |                      |
| Hispanic or Latino                                | 15 (6.3%)         | 19 (7.9%)            | 9 (4.7%)          | 17 (8.5%)            |
| Not Hispanic or Latino                            | 222 (93.7%)       | 221 (92.1%)          | 184 (95.3%)       | 182 (91.5%)          |
| <b>Genotype Group</b>                             |                   |                      |                   |                      |
| F508del Homozygous                                | 140 (59.1%)       | 129 (53.8%)          | 115 (59.6%)       | 105 (52.8%)          |
| F508del Heterozygous                              | 91 (38.4%)        | 106 (44.2%)          | 73 (37.8%)        | 90 (45.2%)           |
| Other/Unknown                                     | 6 (2.5%)          | 5 (2.1%)             | 5 (2.6%)          | 4 (2.0%)             |
| <b>FEV<sub>1</sub> (% predicted)</b>              |                   |                      |                   |                      |
| N                                                 | 237               | 240                  | 193               | 199                  |
| Mean (SD)                                         | 97.2 (16.32)      | 96.5 (17.34)         | 97.0 (16.35)      | 96.8 (17.40)         |
| <b>FEV<sub>1</sub> (% predicted) Distribution</b> |                   |                      |                   |                      |
| <60                                               | 3 (1.3%)          | 1 (0.4%)             | 3 (1.6%)          | 1 (0.5%)             |
| ≥60 to <70                                        | 11 (4.6%)         | 20 (8.3%)            | 10 (5.2%)         | 16 (8.0%)            |
| ≥70 to <90                                        | 63 (26.6%)        | 57 (23.8%)           | 48 (24.9%)        | 46 (23.1%)           |
| ≥90 to <100                                       | 51 (21.5%)        | 53 (22.1%)           | 42 (21.8%)        | 42 (21.1%)           |
| ≥100                                              | 109 (46.0%)       | 109 (45.4%)          | 90 (46.6%)        | 94 (47.2%)           |
| <b>LCl<sub>2.5</sub> †</b>                        |                   |                      |                   |                      |
| N                                                 | 61                | 69                   | 52                | 55                   |
| Mean (SD)                                         | 7.9 (1.77)        | 8.2 (2.73)           | 8.0 (1.83)        | 8.5 (2.96)           |



|                                                    | ITT Population    |                      | PP Population     |                      |
|----------------------------------------------------|-------------------|----------------------|-------------------|----------------------|
|                                                    | Continue<br>N=237 | Discontinue<br>N=240 | Continue<br>N=193 | Discontinue<br>N=199 |
| <b>Prior Study Enrollee</b>                        | 64 (27.0%)        | 65 (27.1%)           | 48 (24.9%)        | 54 (27.1%)           |
| <b>Current Chronic Therapy</b>                     |                   |                      |                   |                      |
| DA                                                 | 237 (100%)        | 240 (100%)           | 193 (100%)        | 199 (100%)           |
| HS                                                 | 147 (62.0%)       | 148 (61.7%)          | 118 (61.1%)       | 120 (60.3%)          |
| ETI                                                | 237 (100%)        | 240 (100%)           | 193 (100%)        | 199 (100%)           |
| Airway clearance                                   | 228 (96.2%)       | 226 (94.2%)          | 185 (95.9%)       | 187 (94.0%)          |
| Inhaled antibiotic (Continuous)                    | 3 (1.3%)          | 6 (2.5%)             | 2 (1.0%)          | 5 (2.5%)             |
| Inhaled antibiotic (Cycled)                        | 50 (21.1%)        | 56 (23.3%)           | 44 (22.8%)        | 50 (25.1%)           |
| Inhaled antibiotic (Continuous Alternating)        | 25 (10.5%)        | 23 (9.6%)            | 20 (10.4%)        | 21 (10.6%)           |
| Oral antibiotic                                    | 103 (43.5%)       | 104 (43.3%)          | 84 (43.5%)        | 88 (44.2%)           |
| Ibuprofen                                          | 20 (8.4%)         | 21 (8.8%)            | 17 (8.8%)         | 20 (10.1%)           |
| Systemic steroids                                  | 2 (0.8%)          | 3 (1.3%)             | 1 (0.5%)          | 3 (1.5%)             |
| <b>Previous Modulator Use †</b>                    |                   |                      |                   |                      |
| Ivacaftor                                          | 7 (3.0%)          | 12 (5.0%)            | 5 (2.6%)          | 12 (6.0%)            |
| Lumacaftor/Ivacaftor                               | 69 (29.1%)        | 62 (25.8%)           | 58 (30.1%)        | 52 (26.1%)           |
| Tezacaftor/Ivacaftor                               | 53 (22.4%)        | 55 (22.9%)           | 41 (21.2%)        | 46 (23.1%)           |
| <b>Positive Microbiology Culture (past year) §</b> |                   |                      |                   |                      |
| Pseudomonas aeruginosa                             | 63 (26.6%)        | 66 (27.5%)           | 55 (28.5%)        | 57 (28.6%)           |
| Staphylococcus aureus                              | 163 (68.8%)       | 158 (65.8%)          | 138 (71.5%)       | 133 (66.8%)          |
| Methicillin-resistant staphylococcus aureus        | 56 (23.6%)        | 54 (22.5%)           | 44 (22.8%)        | 46 (23.1%)           |
| Stenotrophomonas maltophilia                       | 19 (8.0%)         | 9 (3.8%)             | 17 (8.8%)         | 9 (4.5%)             |
| Achromobacter xylooxidans                          | 4 (1.7%)          | 4 (1.7%)             | 4 (2.1%)          | 2 (1.0%)             |
| Burkholderia cepacia complex                       | 4 (1.7%)          | 4 (1.7%)             | 4 (2.1%)          | 4 (2.0%)             |
| Haemophilus influenzae                             | 12 (5.1%)         | 8 (3.3%)             | 10 (5.2%)         | 7 (3.5%)             |
| Mycobacterium abscessus                            | 1 (0.4%)          | 2 (0.8%)             | 1 (0.5%)          | 2 (1.0%)             |
| Mycobacterium avium complex                        | 4 (1.7%)          | 3 (1.3%)             | 4 (2.1%)          | 3 (1.5%)             |

251 Data are mean (SD) or n (%). Percentages may not sum to 100 in each category due to rounding.

252 \*Other includes participants of more than one race.

253 † LCI result could be obtained at either the Week -2 or Week 0 Visit.

254 ‡ Participants may fall into more than one category of prior modulator use.

255 § Culture results obtained clinically within 12 months prior to screening.

256

257 **Figure S2.** Difference between the discontinuation and continuation treatment groups in the 6-week change in  
 258 ppFEV<sub>1</sub> among subgroups in the ITT population in the HS trial and DA trial. Treatment differences adjusted for  
 259 randomization strata. Pre-defined subgroups noted with \*.

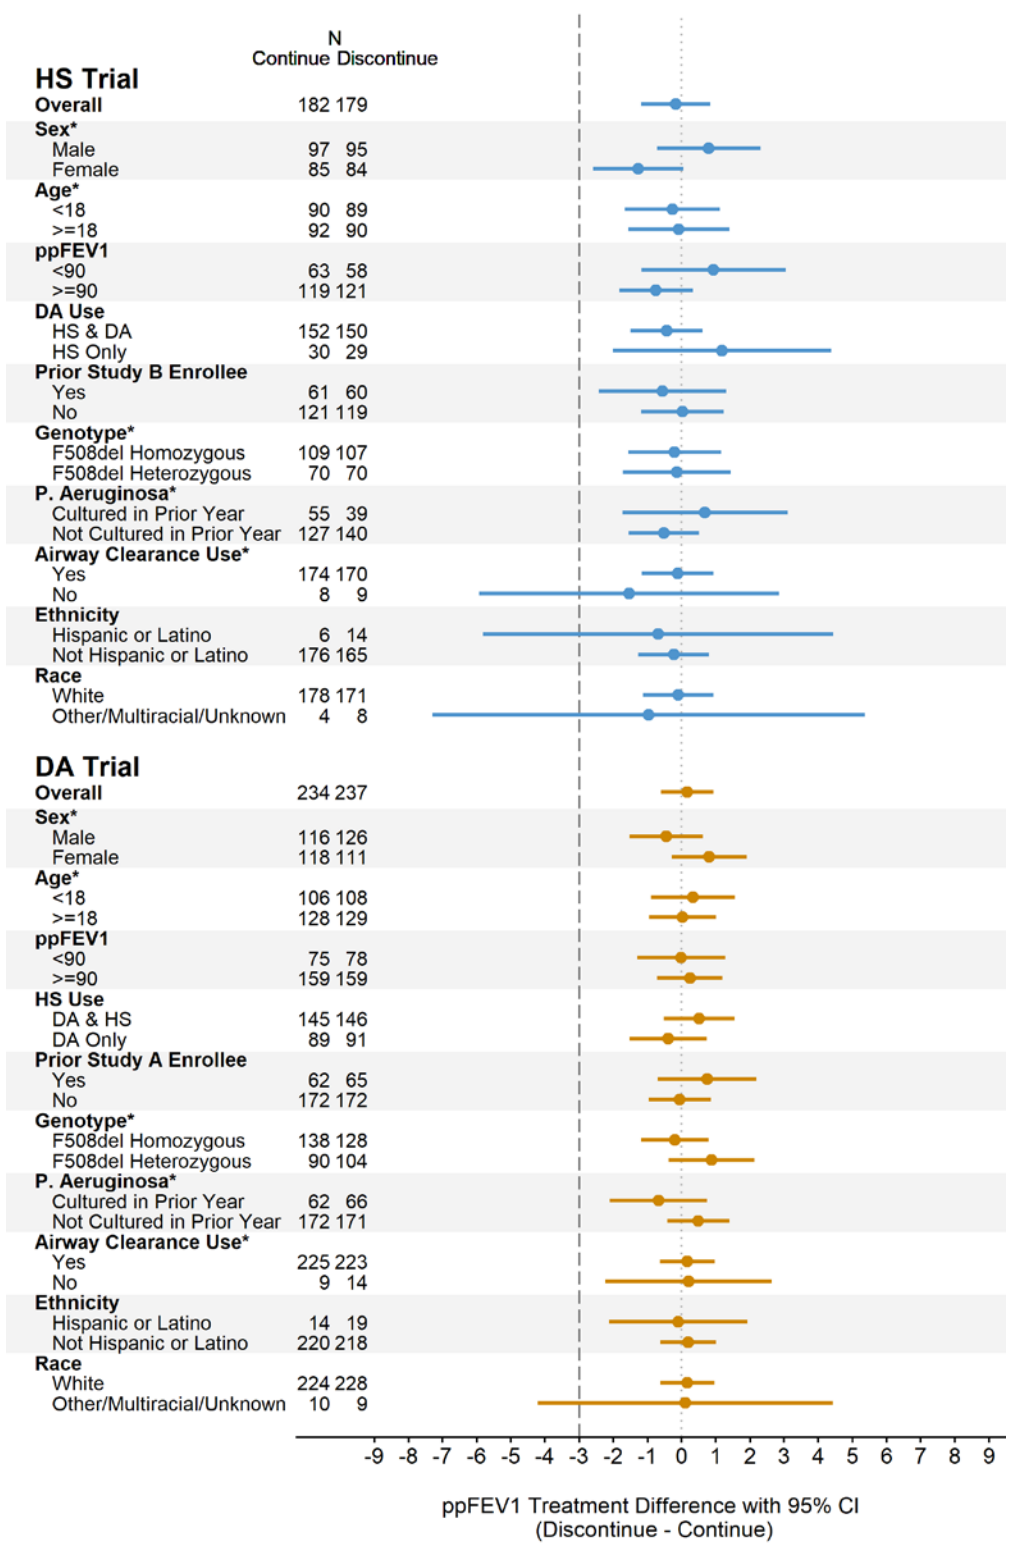

**Table S5.** Summary of ppFEV<sub>1</sub> over time in the PP and ITT populations (HS trial)

| Visit                                                                           | Statistic | ITT Population (HS Trial) |                      |                                                           | PP Population (HS Trial) |                      |                                                           |
|---------------------------------------------------------------------------------|-----------|---------------------------|----------------------|-----------------------------------------------------------|--------------------------|----------------------|-----------------------------------------------------------|
|                                                                                 |           | Continue<br>N=186         | Discontinue<br>N=184 | Difference<br>(Discontinue<br>minus Continue)<br>(95% CI) | Continue<br>N=140        | Discontinue<br>N=133 | Difference<br>(Discontinue<br>minus Continue)<br>(95% CI) |
| Week -2 (Screening)                                                             | N (%)     | 186 (100.0%)              | 184 (100.0%)         |                                                           | 140 (100.0%)             | 133 (100.0%)         |                                                           |
|                                                                                 | Mean (SD) | 97.3 (16.49)              | 96.4 (16.84)         | -0.88 (-4.28, 2.53)                                       | 97.2 (17.15)             | 97.4 (17.21)         | 0.22 (-3.88, 4.31)                                        |
| Week 0 (Randomization)                                                          | N (%)     | 186 (100.0%)              | 184 (100.0%)         |                                                           | 140 (100.0%)             | 133 (100.0%)         |                                                           |
|                                                                                 | Mean (SD) | 97.2 (16.50)              | 96.7 (17.17)         | -0.45 (-3.89, 3.00)                                       | 96.8 (17.30)             | 97.6 (17.55)         | 0.86 (-3.30, 5.02)                                        |
| Absolute Change (Week -2 to Week 0)                                             | N (%)     | 186 (100.0%)              | 184 (100.0%)         |                                                           | 140 (100.0%)             | 133 (100.0%)         |                                                           |
|                                                                                 | Mean (SD) | -0.1 (4.04)               | 0.3 (3.44)           | 0.43 (-0.34, 1.20)                                        | -0.4 (3.86)              | 0.2 (3.63)           | 0.64 (-0.25, 1.54)                                        |
| Relative Change (Week -2 to Week 0)                                             | N (%)     | 186 (100.0%)              | 184 (100.0%)         |                                                           | 140 (100.0%)             | 133 (100.0%)         |                                                           |
|                                                                                 | Mean (SD) | 0.0 (4.71)                | 0.4 (3.87)           | 0.36 (-0.52, 1.24)                                        | -0.4 (4.44)              | 0.3 (4.11)           | 0.64 (-0.38, 1.66)                                        |
| Week 2 (Visit 2)                                                                | N (%)     | 183 (98.4%)               | 177 (96.2%)          |                                                           | 138 (98.6%)              | 128 (96.2%)          |                                                           |
|                                                                                 | Mean (SD) | 97.0 (16.58)              | 96.2 (17.28)         | -0.81 (-4.32, 2.71)                                       | 97.2 (17.18)             | 97.8 (17.42)         | 0.65 (-3.53, 4.83)                                        |
| Absolute Change (Week 0 to Week 2)                                              | N (%)     | 183 (98.4%)               | 177 (96.2%)          |                                                           | 138 (98.6%)              | 128 (96.2%)          |                                                           |
|                                                                                 | Mean (SD) | 0.0 (3.67)                | -0.4 (3.78)          | -0.38 (-1.15, 0.40)                                       | 0.6 (2.94)               | 0.3 (3.66)           | -0.24 (-1.04, 0.57)                                       |
| Relative Change (Week 0 to Week 2)                                              | N (%)     | 183 (98.4%)               | 177 (96.2%)          |                                                           | 138 (98.6%)              | 128 (96.2%)          |                                                           |
|                                                                                 | Mean (SD) | 0.1 (3.98)                | -0.3 (4.18)          | -0.39 (-1.23, 0.46)                                       | 0.7 (3.29)               | 0.5 (4.12)           | -0.22 (-1.12, 0.69)                                       |
| Difference in Absolute Changes<br>(Week 0 to Week 2 minus Week -2 to<br>Week 0) | N (%)     | 183 (98.4%)               | 177 (96.2%)          |                                                           | 138 (98.6%)              | 128 (96.2%)          |                                                           |
|                                                                                 | Mean (SD) | 0.1 (6.57)                | -0.7 (6.07)          | -0.79 (-2.10, 0.52)                                       | 1.0 (5.56)               | 0.1 (6.07)           | -0.89 (-2.30, 0.52)                                       |
| Week 6 (Visit 3)                                                                | N (%)     | 182 (97.8%)               | 179 (97.3%)          |                                                           | 140 (100.0%)             | 133 (100.0%)         |                                                           |
|                                                                                 | Mean (SD) | 96.8 (18.00)              | 96.2 (17.28)         | -0.57 (-4.23, 3.08)                                       | 96.9 (17.74)             | 97.5 (17.10)         | 0.56 (-3.59, 4.71)                                        |
| Absolute Change (Week 0 to Week 6)                                              | N (%)     | 182 (97.8%)               | 179 (97.3%)          |                                                           | 140 (100.0%)             | 133 (100.0%)         |                                                           |
|                                                                                 | Mean (SD) | -0.4 (5.68)               | -0.5 (3.98)          | -0.17 (-1.19, 0.84)                                       | 0.1 (3.64)               | -0.2 (4.10)          | -0.30 (-1.22, 0.63)                                       |

|                                    |                  | ITT Population (HS Trial) |                              |                                                                     | PP Population (HS Trial)  |                              |                                                                     |
|------------------------------------|------------------|---------------------------|------------------------------|---------------------------------------------------------------------|---------------------------|------------------------------|---------------------------------------------------------------------|
| <b>Visit</b>                       | <b>Statistic</b> | <b>Continue<br/>N=186</b> | <b>Discontinue<br/>N=184</b> | <b>Difference<br/>(Discontinue<br/>minus Continue)<br/>(95% CI)</b> | <b>Continue<br/>N=140</b> | <b>Discontinue<br/>N=133</b> | <b>Difference<br/>(Discontinue<br/>minus Continue)<br/>(95% CI)</b> |
| Relative Change (Week 0 to Week 6) | N (%)            | 182 (97.8%)               | 179 (97.3%)                  |                                                                     | 140 (100.0%)              | 133 (100.0%)                 |                                                                     |
|                                    | Mean (SD)        | -0.5 (6.36)               | -0.5 (4.31)                  | -0.01 (-1.13, 1.11)                                                 | 0.1 (3.85)                | 0.0 (4.39)                   | -0.12 (-1.11, 0.87)                                                 |

**Table S6.** Summary of ppFEV<sub>1</sub> over time in the PP and ITT populations (DA trial).

| Visit                                      | Statistic | ITT Population (DA Trial) |                      |                                                           | PP Population (DA Trial) |                      |                                                           |
|--------------------------------------------|-----------|---------------------------|----------------------|-----------------------------------------------------------|--------------------------|----------------------|-----------------------------------------------------------|
|                                            |           | Continue<br>N=186         | Discontinue<br>N=184 | Difference<br>(Discontinue<br>minus Continue)<br>(95% CI) | Continue<br>N=140        | Discontinue<br>N=133 | Difference<br>(Discontinue<br>minus Continue)<br>(95% CI) |
| Week -2 (Screening)                        | N (%)     | 237 (100.0%)              | 240 (100.0%)         |                                                           | 193 (100.0%)             | 199 (100.0%)         |                                                           |
|                                            | Mean (SD) | 97.0 (16.20)              | 96.5 (17.17)         | -0.58 (-3.59, 2.42)                                       | 97.0 (16.10)             | 96.6 (17.16)         | -0.46 (-3.76, 2.85)                                       |
| Week 0 (Randomization)                     | N (%)     | 237 (100.0%)              | 240 (100.0%)         |                                                           | 193 (100.0%)             | 199 (100.0%)         |                                                           |
|                                            | Mean (SD) | 97.2 (16.32)              | 96.5 (17.34)         | -0.70 (-3.73, 2.33)                                       | 97.0 (16.35)             | 96.8 (17.40)         | -0.17 (-3.52, 3.18)                                       |
| Absolute Change (Week -2 to Week 0)        | N (%)     | 237 (100.0%)              | 240 (100.0%)         |                                                           | 193 (100.0%)             | 199 (100.0%)         |                                                           |
|                                            | Mean (SD) | 0.2 (4.00)                | 0.0 (3.24)           | -0.12 (-0.78, 0.54)                                       | 0.0 (3.79)               | 0.2 (3.11)           | 0.28 (-0.40, 0.97)                                        |
| Relative Change (Week -2 to Week 0)        | N (%)     | 237 (100.0%)              | 240 (100.0%)         |                                                           | 193 (100.0%)             | 199 (100.0%)         |                                                           |
|                                            | Mean (SD) | 0.2 (4.38)                | 0.1 (3.45)           | -0.16 (-0.87, 0.55)                                       | 0.0 (4.07)               | 0.3 (3.32)           | 0.28 (-0.46, 1.02)                                        |
| Week 2 (Visit 2)                           | N (%)     | 230 (97.0%)               | 236 (98.3%)          |                                                           | 189 (97.9%)              | 196 (98.5%)          |                                                           |
|                                            | Mean (SD) | 97.6 (16.21)              | 96.1 (17.73)         | -1.45 (-4.54, 1.64)                                       | 97.1 (16.22)             | 96.5 (17.83)         | -0.67 (-4.09, 2.74)                                       |
| Absolute Change (Week 0 to Week 2)         | N (%)     | 230 (97.0%)               | 236 (98.3%)          |                                                           | 189 (97.9%)              | 196 (98.5%)          |                                                           |
|                                            | Mean (SD) | 0.2 (3.91)                | -0.1 (3.60)          | -0.30 (-0.99, 0.38)                                       | 0.1 (3.96)               | -0.1 (3.67)          | -0.15 (-0.92, 0.61)                                       |
| Relative Change (Week 0 to Week 2)         | N (%)     | 230 (97.0%)               | 236 (98.3%)          |                                                           | 189 (97.9%)              | 196 (98.5%)          |                                                           |
|                                            | Mean (SD) | 0.3 (3.87)                | -0.2 (3.83)          | -0.40 (-1.10, 0.30)                                       | 0.2 (3.90)               | -0.1 (3.91)          | -0.27 (-1.05, 0.51)                                       |
| Difference in Absolute Changes             |           |                           |                      |                                                           |                          |                      |                                                           |
| (Week 0 to Week 2 minus Week -2 to Week 0) | N (%)     | 230 (97.0%)               | 236 (98.3%)          |                                                           | 189 (97.9%)              | 196 (98.5%)          |                                                           |
|                                            | Mean (SD) | 0.0 (6.33)                | -0.1 (5.49)          | -0.09 (-1.17, 0.99)                                       | 0.1 (6.14)               | -0.2 (5.51)          | -0.33 (-1.50, 0.84)                                       |
| Week 6 (Visit 3)                           | N (%)     | 234 (98.7%)               | 237 (98.8%)          |                                                           | 193 (100.0%)             | 199 (100.0%)         |                                                           |
|                                            | Mean (SD) | 97.3 (16.36)              | 96.4 (17.36)         | -0.86 (-3.92, 2.19)                                       | 96.8 (16.39)             | 97.0 (17.30)         | 0.20 (-3.15, 3.54)                                        |
| Absolute Change (Week 0 to Week 6)         | N (%)     | 234 (98.7%)               | 237 (98.8%)          |                                                           | 193 (100.0%)             | 199 (100.0%)         |                                                           |
|                                            | Mean (SD) | -0.1 (4.37)               | 0.0 (4.10)           | 0.17 (-0.60, 0.93)                                        | -0.2 (4.37)              | 0.2 (3.69)           | 0.37 (-0.44, 1.17)                                        |
| Relative Change (Week 0 to Week 6)         | N (%)     | 234 (98.7%)               | 237 (98.8%)          |                                                           | 193 (100.0%)             | 199 (100.0%)         |                                                           |
|                                            | Mean (SD) | -0.1 (4.54)               | 0.1 (4.38)           | 0.19 (-0.62, 0.99)                                        | -0.1 (4.51)              | 0.3 (3.97)           | 0.40 (-0.45, 1.24)                                        |

**Figure S3.** Individual changes in the 6-week change in ppFEV<sub>1</sub> for the (A) ITT and (B) PP populations (HS trial).

- A) In the Continue and Discontinue arms, respectively, 153/182 (84%) and 147/179 (82%) of participants had a Week 6 ppFEV<sub>1</sub> within 5% of their baseline value (i.e., ppFEV<sub>1</sub> change between -5 and 5%).

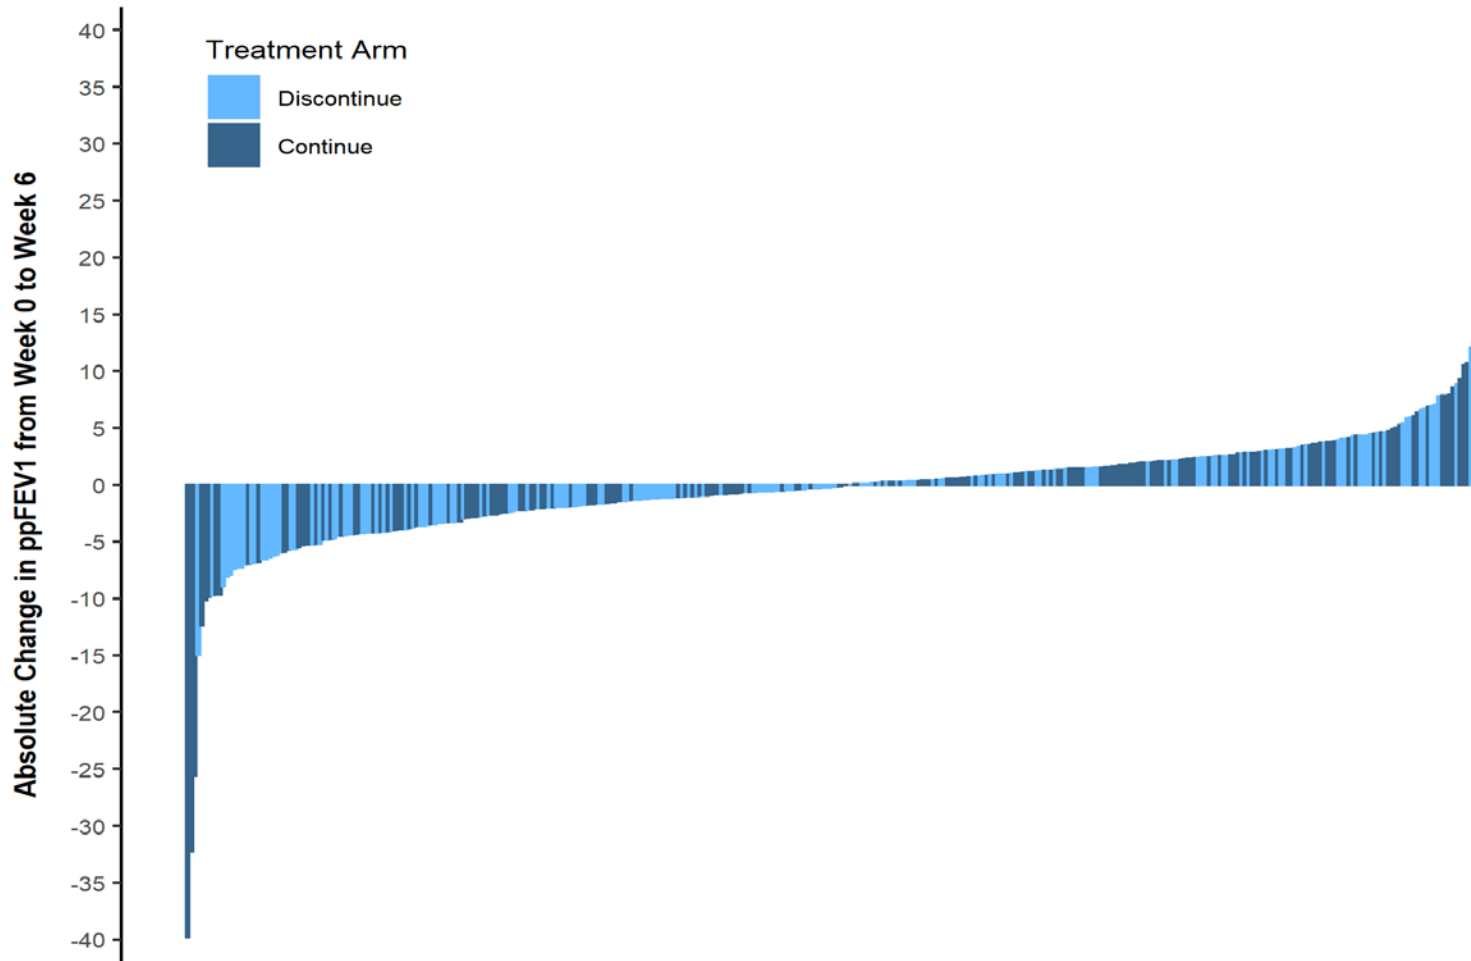

B) In the Continue and Discontinue arms, respectively, 118/140 (84%) and 107/133 (80%) of participants had a Week 6 ppFEV<sub>1</sub> within 5% of their baseline value (i.e., ppFEV<sub>1</sub> change between -5 and 5%).

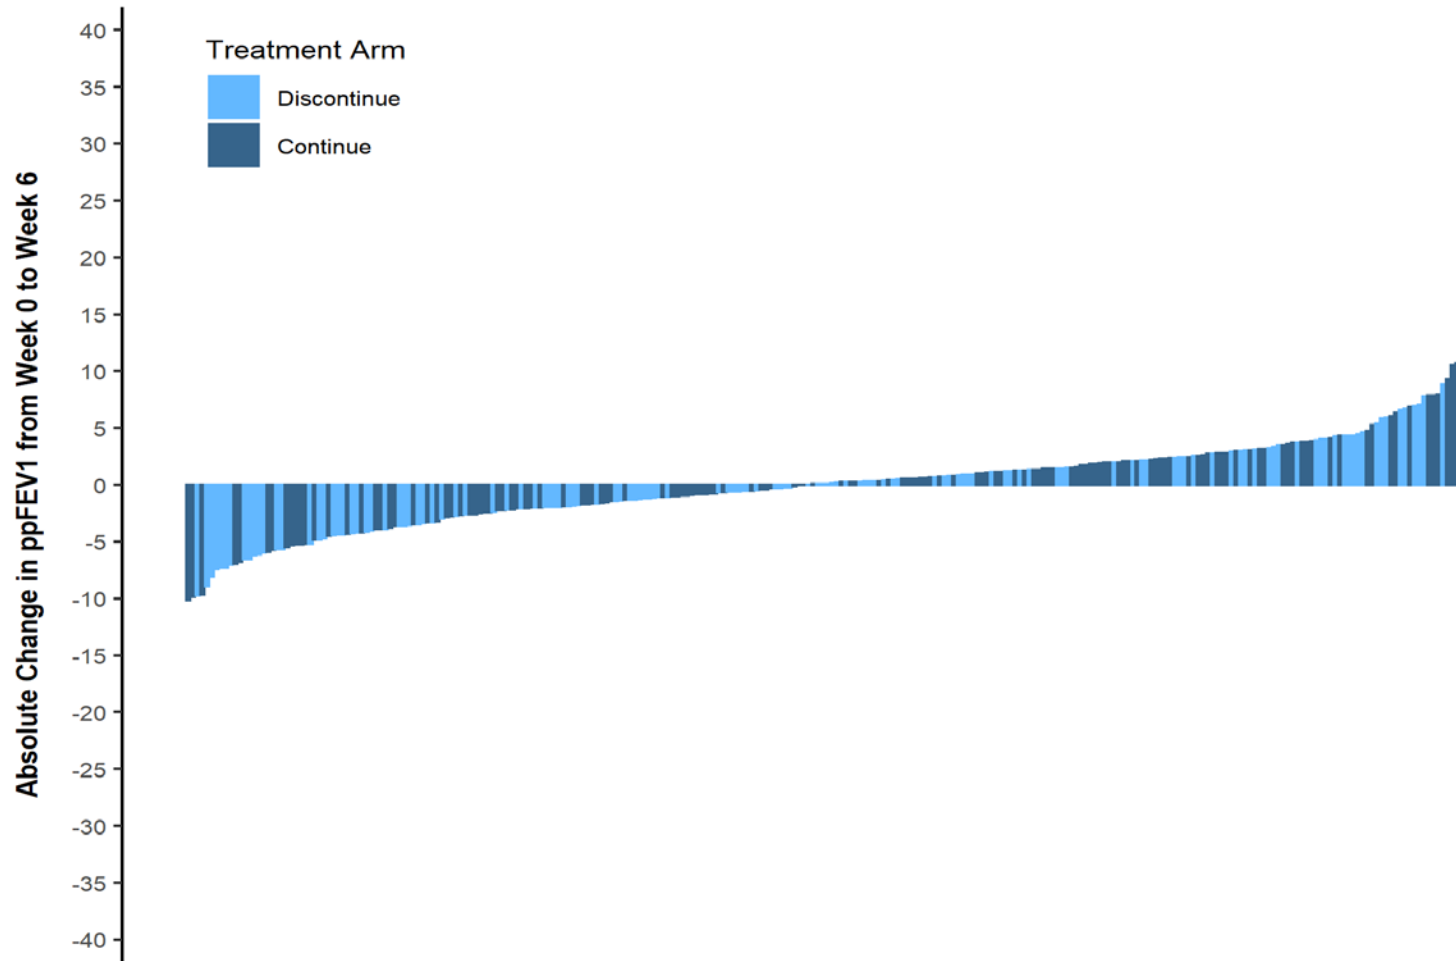

**Figure S4.** Individual changes in the 6-week change in ppFEV<sub>1</sub> for the (A) ITT and (B) PP populations (DA trial).

A) In the Continue and Discontinue arms, respectively, 187/234 (80%) and 192/237 (81%) of participants had a Week 6 ppFEV<sub>1</sub> within 5% of their baseline value (i.e., ppFEV<sub>1</sub> change between -5 and 5%).

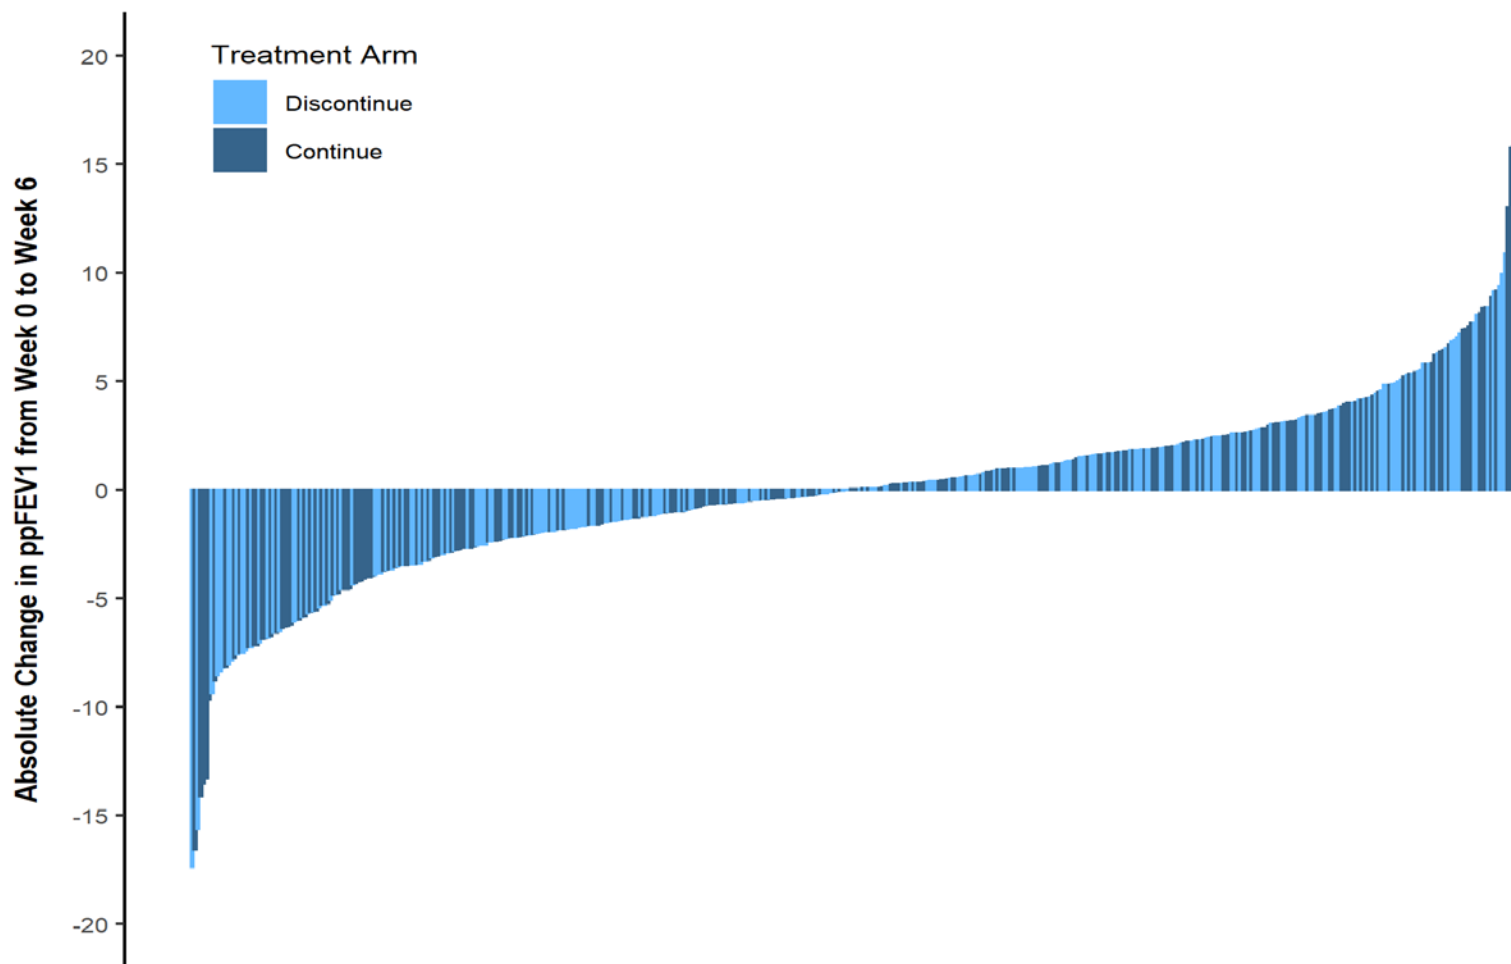



B) In the Continue and Discontinue arms, respectively, 155/193 (80%) and 165/199 (83%) of participants had a Week 6 ppFEV<sub>1</sub> within 5% of their baseline value (i.e., ppFEV<sub>1</sub> change between -5 and 5%).

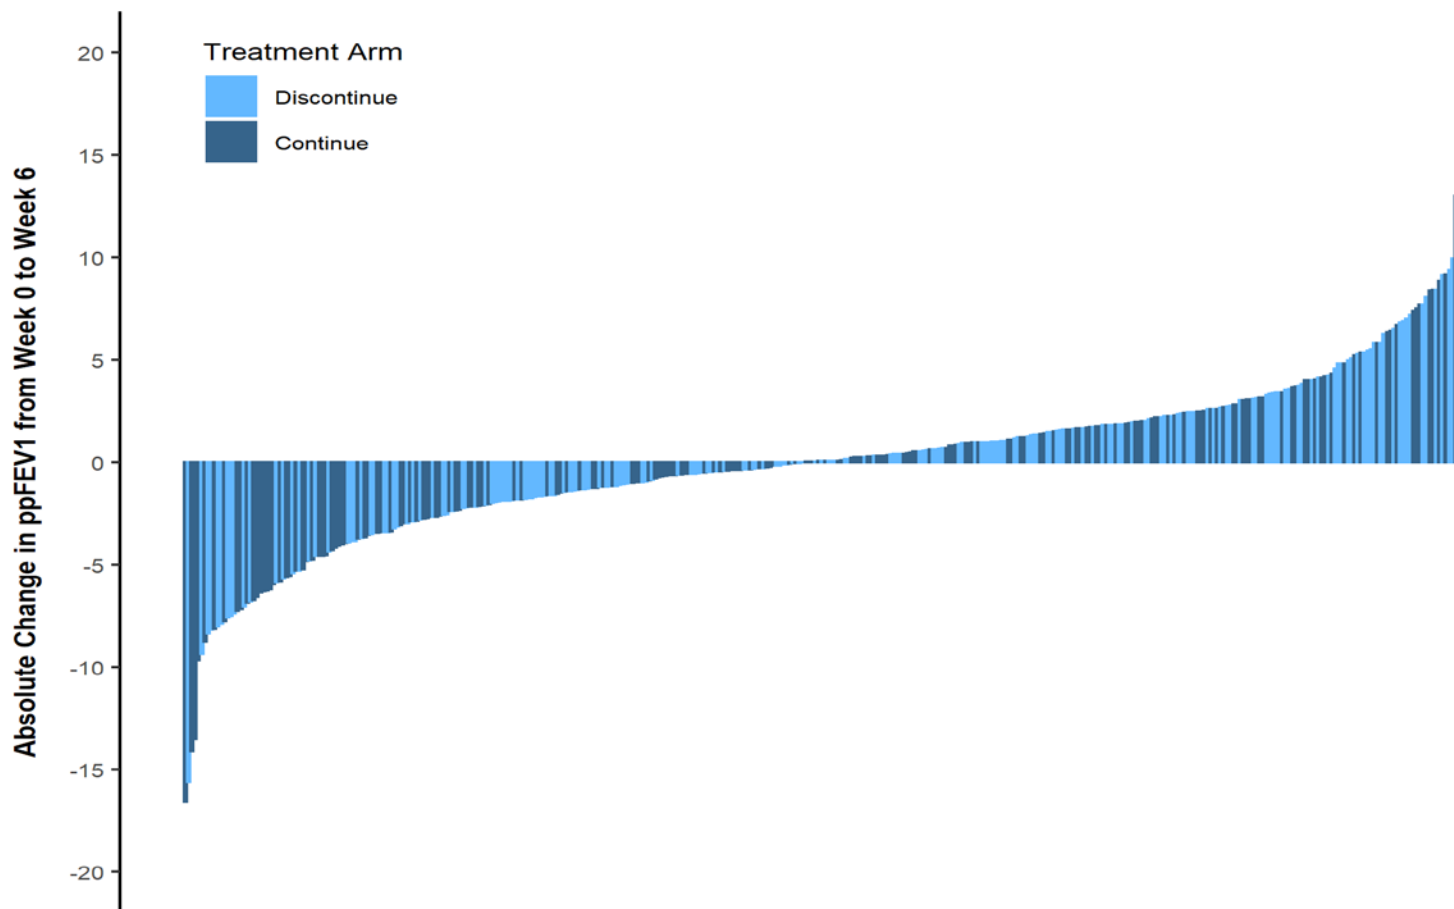

**Table S7.** Comparison of demographic and baseline characteristics among ITT and PP populations in the overall HS trial and in the sub-cohort for whom LCI<sub>2.5</sub> was available at baseline.

|                                                   | Overall (HS Trial)      |                        | LCI Subset (HS Trial)  |                       |
|---------------------------------------------------|-------------------------|------------------------|------------------------|-----------------------|
|                                                   | ITT Population<br>N=370 | PP Population<br>N=273 | ITT Population<br>N=99 | PP Population<br>N=66 |
| <b>Sex at Birth</b>                               |                         |                        |                        |                       |
| Male                                              | 196 (53.0%)             | 145 (53.1%)            | 47 (47.5%)             | 28 (42.4%)            |
| Female                                            | 174 (47.0%)             | 128 (46.9%)            | 52 (52.5%)             | 38 (57.6%)            |
| <b>Age (years)</b>                                |                         |                        |                        |                       |
| N                                                 | 370                     | 273                    | 99                     | 66                    |
| Mean (SD)                                         | 22.0 (10.50)            | 22.7 (11.22)           | 19.9 (9.49)            | 20.4 (10.51)          |
| <b>Age Distribution</b>                           |                         |                        |                        |                       |
| ≥12 to <18                                        | 182 (49.2%)             | 132 (48.4%)            | 60 (60.6%)             | 40 (60.6%)            |
| ≥18 to <24                                        | 76 (20.5%)              | 52 (19.0%)             | 18 (18.2%)             | 10 (15.2%)            |
| ≥24 to <30                                        | 50 (13.5%)              | 37 (13.6%)             | 10 (10.1%)             | 7 (10.6%)             |
| ≥30                                               | 62 (16.8%)              | 52 (19.0%)             | 11 (11.1%)             | 9 (13.6%)             |
| <b>Race</b>                                       |                         |                        |                        |                       |
| White                                             | 358 (96.8%)             | 264 (96.7%)            | 98 (99.0%)             | 66 (100%)             |
| Black or African American                         | 3 (0.8%)                | 3 (1.1%)               | 0 (0.0%)               | 0 (0.0%)              |
| Asian                                             | 1 (0.3%)                | 0 (0.0%)               | 0 (0.0%)               | 0 (0.0%)              |
| American Indian or Alaskan Native                 | 0 (0.0%)                | 0 (0.0%)               | 0 (0.0%)               | 0 (0.0%)              |
| Native Hawaiian or Other Pacific Islander         | 0 (0.0%)                | 0 (0.0%)               | 0 (0.0%)               | 0 (0.0%)              |
| Other/Unknown*                                    | 8 (2.2%)                | 6 (2.2%)               | 1 (1.0%)               | 0 (0.0%)              |
| <b>Ethnicity</b>                                  |                         |                        |                        |                       |
| Hispanic or Latino                                | 20 (5.4%)               | 17 (6.2%)              | 6 (6.1%)               | 4 (6.1%)              |
| Not Hispanic or Latino                            | 350 (94.6%)             | 256 (93.8%)            | 93 (93.9%)             | 62 (93.9%)            |
| <b>Genotype Group</b>                             |                         |                        |                        |                       |
| F508del Homozygous                                | 222 (60.0%)             | 166 (60.8%)            | 66 (66.7%)             | 44 (66.7%)            |
| F508del Heterozygous                              | 143 (38.6%)             | 104 (38.1%)            | 32 (32.3%)             | 21 (31.8%)            |
| Other/Unknown                                     | 5 (1.4%)                | 3 (1.1%)               | 1 (1.0%)               | 1 (1.5%)              |
| <b>FEV<sub>1</sub> (% predicted)</b>              |                         |                        |                        |                       |
| N                                                 | 370                     | 273                    | 99                     | 66                    |
| Mean (SD)                                         | 97.0 (16.82)            | 97.2 (17.40)           | 100.5 (15.53)          | 100.3 (16.40)         |
| <b>FEV<sub>1</sub> (% predicted) Distribution</b> |                         |                        |                        |                       |
| <60                                               | 2 (0.5%)                | 2 (0.7%)               | 0 (0.0%)               | 0 (0.0%)              |
| ≥60 to <70                                        | 23 (6.2%)               | 19 (7.0%)              | 3 (3.0%)               | 3 (4.5%)              |
| ≥70 to <90                                        | 99 (26.8%)              | 69 (25.3%)             | 21 (21.2%)             | 14 (21.2%)            |
| ≥90 to <100                                       | 78 (21.1%)              | 57 (20.9%)             | 23 (23.2%)             | 16 (24.2%)            |
| ≥100                                              | 168 (45.4%)             | 126 (46.2%)            | 52 (52.5%)             | 33 (50.0%)            |
| <b>LCI<sub>2.5</sub> †</b>                        |                         |                        |                        |                       |
| N                                                 | 99                      | 66                     | 99                     | 66                    |

|                                                    | Overall (HS Trial)      |                        | LCI Subset (HS Trial)  |                       |
|----------------------------------------------------|-------------------------|------------------------|------------------------|-----------------------|
|                                                    | ITT Population<br>N=370 | PP Population<br>N=273 | ITT Population<br>N=99 | PP Population<br>N=66 |
| Mean (SD)                                          | 8.0 (2.37)              | 7.9 (2.47)             | 8.0 (2.37)             | 7.9 (2.47)            |
| <b>Prior Study Enrollee</b>                        |                         |                        |                        |                       |
|                                                    | 124 (33.5%)             | 87 (31.9%)             | 37 (37.4%)             | 22 (33.3%)            |
| <b>Current Chronic Therapy</b>                     |                         |                        |                        |                       |
| DA                                                 | 310 (83.8%)             | 231 (84.6%)            | 81 (81.8%)             | 54 (81.8%)            |
| HS                                                 | 370 (100%)              | 273 (100%)             | 99 (100%)              | 66 (100%)             |
| ETI                                                | 370 (100%)              | 273 (100%)             | 99 (100%)              | 66 (100%)             |
| Airway clearance                                   | 352 (95.1%)             | 259 (94.9%)            | 97 (98.0%)             | 65 (98.5%)            |
| Inhaled antibiotic (Continuous)                    | 9 (2.4%)                | 4 (1.5%)               | 2 (2.0%)               | 1 (1.5%)              |
| Inhaled antibiotic (Cycled)                        | 94 (25.4%)              | 73 (26.7%)             | 19 (19.2%)             | 11 (16.7%)            |
| Inhaled antibiotic (Continuous Alternating)        | 32 (8.6%)               | 23 (8.4%)              | 8 (8.1%)               | 7 (10.6%)             |
| Oral antibiotic                                    | 166 (44.9%)             | 123 (45.1%)            | 51 (51.5%)             | 34 (51.5%)            |
| Ibuprofen                                          | 23 (6.2%)               | 19 (7.0%)              | 4 (4.0%)               | 4 (6.1%)              |
| Systemic steroids                                  | 3 (0.8%)                | 2 (0.7%)               | 0 (0.0%)               | 0 (0.0%)              |
| <b>Previous Modulator Use †</b>                    |                         |                        |                        |                       |
| Ivacaftor                                          | 9 (2.4%)                | 7 (2.6%)               | 3 (3.0%)               | 3 (4.5%)              |
| Lumacaftor/Ivacaftor                               | 103 (27.8%)             | 73 (26.7%)             | 35 (35.4%)             | 25 (37.9%)            |
| Tezacaftor/Ivacaftor                               | 88 (23.8%)              | 61 (22.3%)             | 26 (26.3%)             | 18 (27.3%)            |
| <b>Positive Microbiology Culture (past year) §</b> |                         |                        |                        |                       |
| Pseudomonas aeruginosa                             | 96 (25.9%)              | 74 (27.1%)             | 21 (21.2%)             | 18 (27.3%)            |
| Staphylococcus aureus                              | 255 (68.9%)             | 194 (71.1%)            | 73 (73.7%)             | 49 (74.2%)            |
| Methicillin-resistant staphylococcus aureus        | 74 (20.0%)              | 52 (19.0%)             | 21 (21.2%)             | 12 (18.2%)            |
| Stenotrophomonas maltophilia                       | 20 (5.4%)               | 17 (6.2%)              | 5 (5.1%)               | 5 (7.6%)              |
| Achromobacter xylosoxidans                         | 3 (0.8%)                | 1 (0.4%)               | 1 (1.0%)               | 0 (0.0%)              |
| Burkholderia cepacia complex                       | 5 (1.4%)                | 3 (1.1%)               | 0 (0.0%)               | 0 (0.0%)              |
| Haemophilus influenzae                             | 14 (3.8%)               | 8 (2.9%)               | 4 (4.0%)               | 1 (1.5%)              |
| Mycobacterium abscessus                            | 3 (0.8%)                | 1 (0.4%)               | 0 (0.0%)               | 0 (0.0%)              |
| Mycobacterium avium complex                        | 4 (1.1%)                | 0 (0.0%)               | 1 (1.0%)               | 0 (0.0%)              |

Data are mean (SD) or n (%). Percentages may not sum to 100 in each category due to rounding.

\*Other includes participants of more than one race.

† LCI result could be obtained at either the Week -2 or Week 0 Visit.

‡ Participants may fall into more than one category of prior modulator use.

§ Culture results obtained clinically within 12 months prior to screening.

**Table S8.** Comparison of demographic and baseline characteristics among ITT and PP populations in the overall DA trial and in the sub-cohort for whom LCI<sub>2.5</sub> was available at baseline.

|                                                   | Overall (DA Trial)      |                        | LCI Subset (DA Trial)   |                        |
|---------------------------------------------------|-------------------------|------------------------|-------------------------|------------------------|
|                                                   | ITT Population<br>N=477 | PP Population<br>N=392 | ITT Population<br>N=130 | PP Population<br>N=107 |
| <b>Sex at Birth</b>                               |                         |                        |                         |                        |
| Male                                              | 244 (51.2%)             | 197 (50.3%)            | 67 (51.5%)              | 54 (50.5%)             |
| Female                                            | 233 (48.8%)             | 195 (49.7%)            | 63 (48.5%)              | 53 (49.5%)             |
| <b>Age (years)</b>                                |                         |                        |                         |                        |
| N                                                 | 477                     | 392                    | 130                     | 107                    |
| Mean (SD)                                         | 22.6 (10.41)            | 22.9 (10.68)           | 20.5 (8.59)             | 21.0 (9.15)            |
| <b>Age Distribution</b>                           |                         |                        |                         |                        |
| ≥12 to <18                                        | 218 (45.7%)             | 174 (44.4%)            | 71 (54.6%)              | 55 (51.4%)             |
| ≥18 to <24                                        | 99 (20.8%)              | 81 (20.7%)             | 27 (20.8%)              | 23 (21.5%)             |
| ≥24 to <30                                        | 63 (13.2%)              | 52 (13.3%)             | 16 (12.3%)              | 14 (13.1%)             |
| ≥30                                               | 97 (20.3%)              | 85 (21.7%)             | 16 (12.3%)              | 15 (14.0%)             |
| <b>Race</b>                                       |                         |                        |                         |                        |
| White                                             | 458 (96.0%)             | 379 (96.7%)            | 127 (97.7%)             | 106 (99.1%)            |
| Black or African American                         | 5 (1.0%)                | 4 (1.0%)               | 0 (0.0%)                | 0 (0.0%)               |
| Asian                                             | 1 (0.2%)                | 1 (0.3%)               | 0 (0.0%)                | 0 (0.0%)               |
| American Indian or Alaskan Native                 | 1 (0.2%)                | 1 (0.3%)               | 0 (0.0%)                | 0 (0.0%)               |
| Native Hawaiian or Other Pacific Islander         | 0 (0.0%)                | 0 (0.0%)               | 0 (0.0%)                | 0 (0.0%)               |
| Other/Unknown*                                    | 12 (2.5%)               | 7 (1.8%)               | 3 (2.3%)                | 1 (0.9%)               |
| <b>Ethnicity</b>                                  |                         |                        |                         |                        |
| Hispanic or Latino                                | 34 (7.1%)               | 26 (6.6%)              | 7 (5.4%)                | 5 (4.7%)               |
| Not Hispanic or Latino                            | 443 (92.9%)             | 366 (93.4%)            | 123 (94.6%)             | 102 (95.3%)            |
| <b>Genotype Group</b>                             |                         |                        |                         |                        |
| F508del Homozygous                                | 269 (56.4%)             | 220 (56.1%)            | 86 (66.2%)              | 69 (64.5%)             |
| F508del Heterozygous                              | 197 (41.3%)             | 163 (41.6%)            | 43 (33.1%)              | 37 (34.6%)             |
| Other/Unknown                                     | 11 (2.3%)               | 9 (2.3%)               | 1 (0.8%)                | 1 (0.9%)               |
| <b>FEV<sub>1</sub> (% predicted)</b>              |                         |                        |                         |                        |
| N                                                 | 477                     | 392                    | 130                     | 107                    |
| Mean (SD)                                         | 96.8 (16.83)            | 96.9 (16.87)           | 99.9 (15.19)            | 99.5 (15.26)           |
| <b>FEV<sub>1</sub> (% predicted) Distribution</b> |                         |                        |                         |                        |
| <60                                               | 4 (0.8%)                | 4 (1.0%)               | 0 (0.0%)                | 0 (0.0%)               |
| ≥60 to <70                                        | 31 (6.5%)               | 26 (6.6%)              | 4 (3.1%)                | 4 (3.7%)               |
| ≥70 to <90                                        | 120 (25.2%)             | 94 (24.0%)             | 27 (20.8%)              | 22 (20.6%)             |
| ≥90 to <100                                       | 104 (21.8%)             | 84 (21.4%)             | 30 (23.1%)              | 23 (21.5%)             |
| ≥100                                              | 218 (45.7%)             | 184 (46.9%)            | 69 (53.1%)              | 58 (54.2%)             |
| <b>LCI<sub>2.5</sub> †</b>                        |                         |                        |                         |                        |
| N                                                 | 130                     | 107                    | 130                     | 107                    |
| Mean (SD)                                         | 8.1 (2.32)              | 8.2 (2.47)             | 8.1 (2.32)              | 8.2 (2.47)             |

|                                                    | Overall (DA Trial)      |                        | LCI Subset (DA Trial)   |                        |
|----------------------------------------------------|-------------------------|------------------------|-------------------------|------------------------|
|                                                    | ITT Population<br>N=477 | PP Population<br>N=392 | ITT Population<br>N=130 | PP Population<br>N=107 |
| <b>Prior Study Enrollee</b>                        | 128 (27.0%)             | 102 (26.0%)            | 30 (23.1%)              | 23 (21.5%)             |
| <b>Current Chronic Therapy</b>                     |                         |                        |                         |                        |
| DA                                                 | 477 (100%)              | 392 (100%)             | 130 (100%)              | 107 (100%)             |
| HS                                                 | 295 (61.8%)             | 238 (60.7%)            | 79 (60.8%)              | 65 (60.7%)             |
| ETI                                                | 477 (100%)              | 392 (100%)             | 130 (100%)              | 107 (100%)             |
| Airway clearance                                   | 454 (95.2%)             | 372 (94.9%)            | 125 (96.2%)             | 103 (96.3%)            |
| Inhaled antibiotic (Continuous)                    | 9 (1.9%)                | 7 (1.8%)               | 1 (0.8%)                | 1 (0.9%)               |
| Inhaled antibiotic (Cycled)                        | 106 (22.2%)             | 94 (24.0%)             | 28 (21.5%)              | 25 (23.4%)             |
| Inhaled antibiotic (Continuous Alternating)        | 48 (10.1%)              | 41 (10.5%)             | 10 (7.7%)               | 8 (7.5%)               |
| Oral antibiotic                                    | 207 (43.4%)             | 172 (43.9%)            | 68 (52.3%)              | 55 (51.4%)             |
| Ibuprofen                                          | 41 (8.6%)               | 37 (9.4%)              | 14 (10.8%)              | 12 (11.2%)             |
| Systemic steroids                                  | 5 (1.0%)                | 4 (1.0%)               | 2 (1.5%)                | 2 (1.9%)               |
| <b>Previous Modulator Use †</b>                    |                         |                        |                         |                        |
| Ivacaftor                                          | 19 (4.0%)               | 17 (4.3%)              | 3 (2.3%)                | 3 (2.8%)               |
| Lumacaftor/Ivacaftor                               | 131 (27.5%)             | 110 (28.1%)            | 40 (30.8%)              | 36 (33.6%)             |
| Tezacaftor/Ivacaftor                               | 108 (22.6%)             | 87 (22.2%)             | 31 (23.8%)              | 26 (24.3%)             |
| <b>Positive Microbiology Culture (past year) §</b> |                         |                        |                         |                        |
| Pseudomonas aeruginosa                             | 129 (27.0%)             | 112 (28.6%)            | 32 (24.6%)              | 29 (27.1%)             |
| Staphylococcus aureus                              | 321 (67.3%)             | 271 (69.1%)            | 93 (71.5%)              | 76 (71.0%)             |
| Methicillin-resistant staphylococcus aureus        | 110 (23.1%)             | 90 (23.0%)             | 33 (25.4%)              | 23 (21.5%)             |
| Stenotrophomonas maltophilia                       | 28 (5.9%)               | 26 (6.6%)              | 9 (6.9%)                | 9 (8.4%)               |
| Achromobacter xylosoxidans                         | 8 (1.7%)                | 6 (1.5%)               | 1 (0.8%)                | 1 (0.9%)               |
| Burkholderia cepacia complex                       | 8 (1.7%)                | 8 (2.0%)               | 2 (1.5%)                | 2 (1.9%)               |
| Haemophilus influenzae                             | 20 (4.2%)               | 17 (4.3%)              | 9 (6.9%)                | 8 (7.5%)               |
| Mycobacterium abscessus                            | 3 (0.6%)                | 3 (0.8%)               | 1 (0.8%)                | 1 (0.9%)               |
| Mycobacterium avium complex                        | 7 (1.5%)                | 7 (1.8%)               | 1 (0.8%)                | 1 (0.9%)               |

Data are mean (SD) or n (%). Percentages may not sum to 100 in each category due to rounding.

\*Other includes participants of more than one race.

† LCI result could be obtained at either the Week -2 or Week 0 Visit.

‡ Participants may fall into more than one category of prior modulator use.

§ Culture results obtained clinically within 12 months prior to screening.

**Figure S5.** (A) Unadjusted mean relative changes from baseline in  $LCI_{2.5}$ . Bars indicate standard errors. (B) Estimated differences between the discontinuation and continuation arms in the 6-week relative change in the cohort for whom  $LCI_{2.5}$  was available among the primary PP population and ITT population with and without imputation to account for missing data. Treatment differences adjusted for randomization strata.

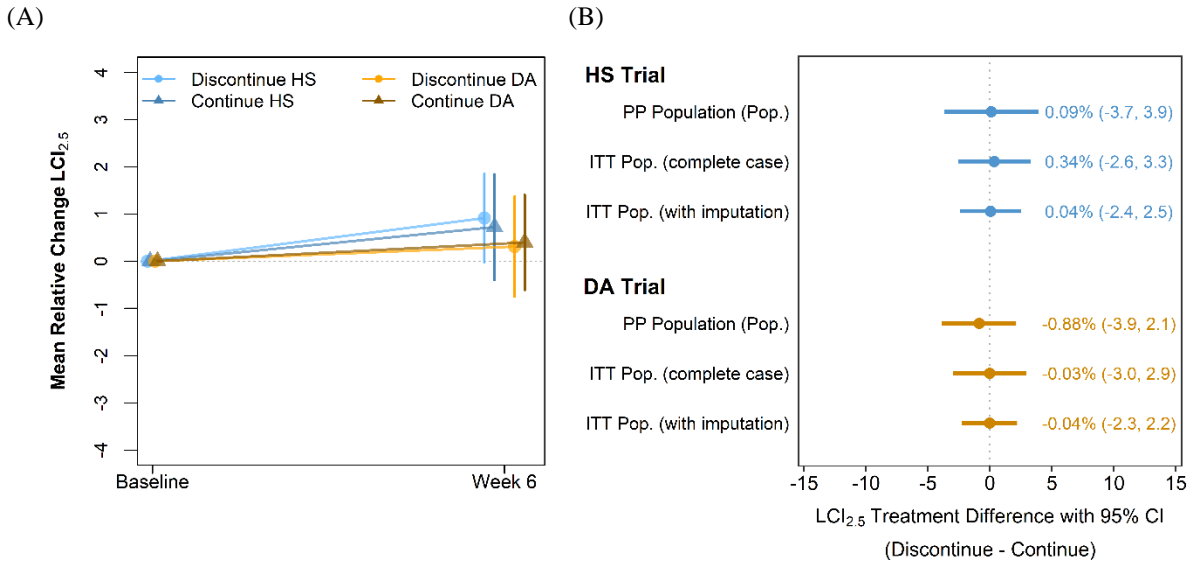

**Figure S6.** Unadjusted mean changes from baseline in (A) CRISS and (C) CFQ-R across the entire study cohort. Bars indicate standard errors. Estimated differences between the discontinuation and continuation arms in the 6-week change in (B) CRISS and (D) CFQ-R among the primary PP population and ITT population with and without imputation to account for missing data. Treatment differences adjusted for randomization strata.

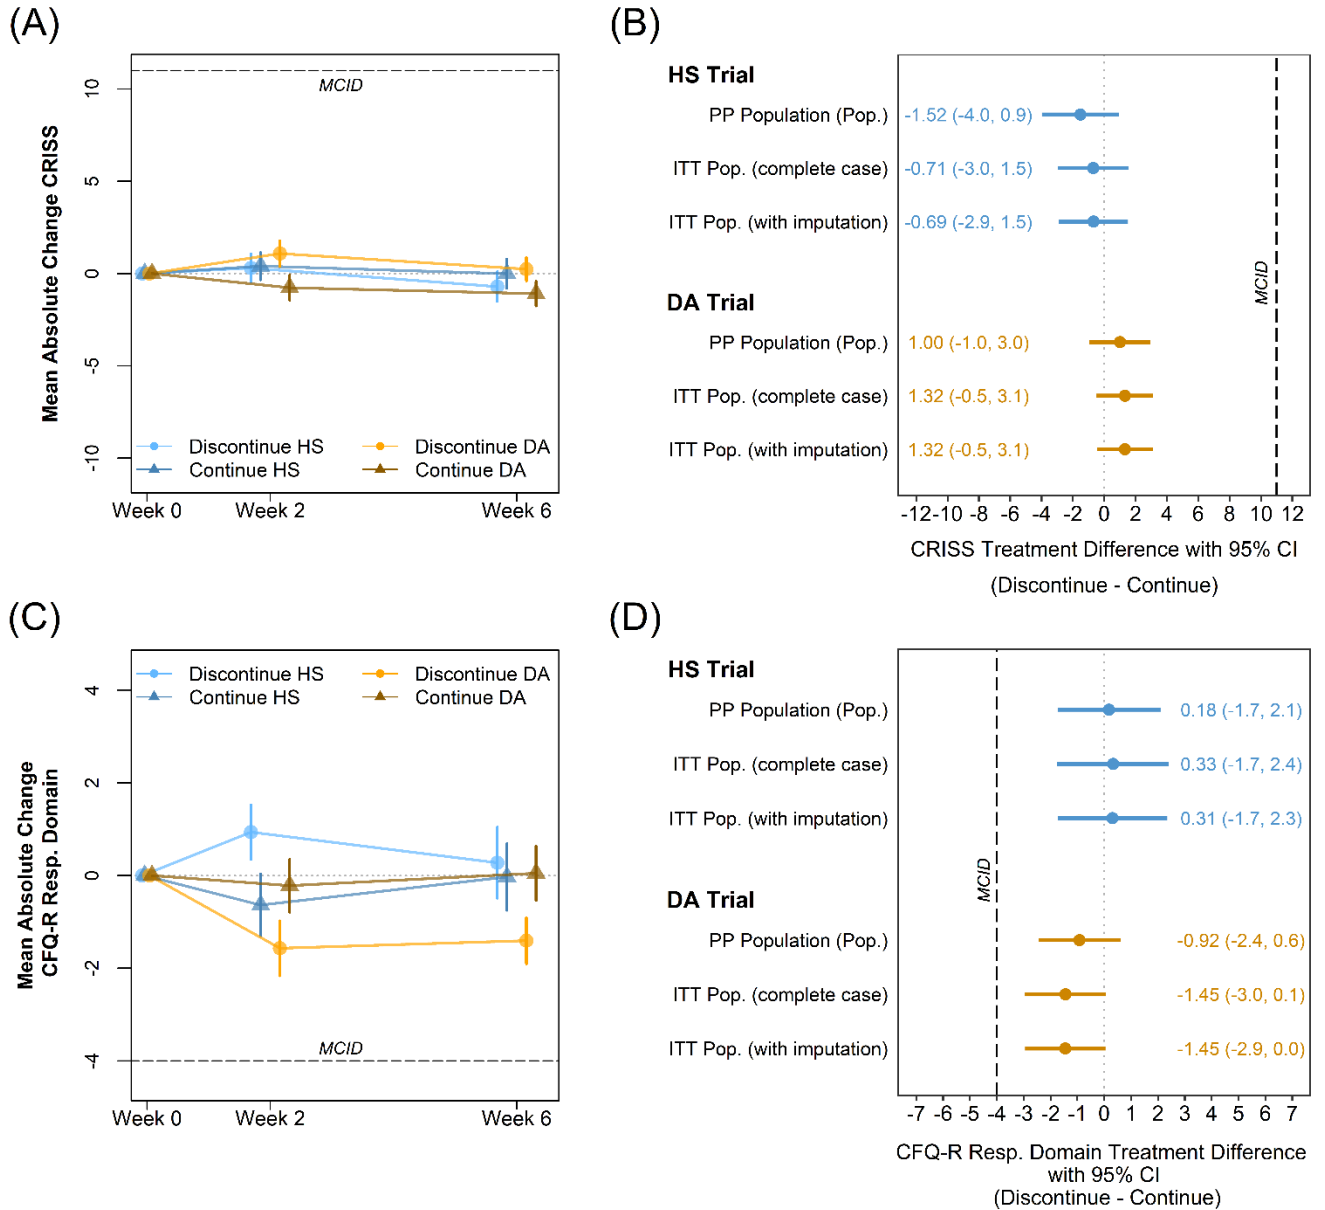

Mean (median; interquartile range [IQR]) CRISS and CFQ-R Respiratory Domain scores at Week 0 were 11.5 (14; 0–23) and 94.1 (100; 88.9–100) in the HS trial and 12.0 (14; 0–23) and 95.0 (100; 94.4–100) in the DA trial, respectively.

**Table S9.** Overview of secondary outcomes including exacerbations, hospitalizations and acute antibiotic use (HS Trial)

|                                                            | Hypertonic Saline (HS) Trial |                      |                           |
|------------------------------------------------------------|------------------------------|----------------------|---------------------------|
|                                                            | Continue<br>N=186            | Discontinue<br>N=184 | Adjusted OR *<br>(95% CI) |
| Participants initiating acute antibiotics, n (%)           | 9 (4.8%)                     | 11 (6.0%)            | 1.27 (0.5, 3.1)           |
| Participants with at least one protocol-defined PEx, n (%) | 3 (1.6%)                     | 1 (0.5%)             | 0.33 (0.0, 2.6)           |
| Participants with at least one hospitalization, n (%)      | 1 (0.5%)                     | 2 (1.1%)             | 2.14 (0.2, 47.1)          |

PEx= Pulmonary exacerbation;\* Odds ratio (OR) estimates from logistic regression models adjusted for randomization strata.

**Table S10.** Overview of secondary outcomes including exacerbations, hospitalizations and acute antibiotic use (DA Trial)

|                                                            | Dornase Alfa (DA) Trial |                      |                           |
|------------------------------------------------------------|-------------------------|----------------------|---------------------------|
|                                                            | Continue<br>N=237       | Discontinue<br>N=240 | Adjusted OR *<br>(95% CI) |
| Participants initiating acute antibiotics, n (%)           | 8 (3.4%)                | 14 (5.8%)            | 1.78 (0.7, 4.5)           |
| Participants with at least one protocol-defined PEx, n (%) | 2 (0.8%)                | 4 (1.7%)             | 2.02 (0.4, 14.8)          |
| Participants with at least one hospitalization, n (%)      | 0 (0.0%)                | 0 (0.0%)             | -                         |

\* Odds ratio (OR) estimates from logistic regression models adjusted for randomization strata.

**Table S11.** Post-hoc summary of respiratory adverse events by baseline ppFEV<sub>1</sub>.

|                                                      | Hypertonic Saline (HS) Trial |                      | Dornase Alfa (DA) Trial |                      |
|------------------------------------------------------|------------------------------|----------------------|-------------------------|----------------------|
|                                                      | Continue<br>N=186            | Discontinue<br>N=184 | Continue<br>N=237       | Discontinue<br>N=240 |
| All Participants, N                                  | 186                          | 184                  | 237                     | 240                  |
| Participants with at least one respiratory AE, n (%) | 22 (11.8%)                   | 30 (16.3%)           | 24 (10.1%)              | 47 (19.6%)           |
| ppFEV <sub>1</sub> <70%, N                           | 11                           | 14                   | 14                      | 21                   |
| Participants with at least one respiratory AE, n (%) | 1 (9.1%)                     | 5 (35.7%)            | 1 (7.1%)                | 7 (33.3%)            |
| ppFEV <sub>1</sub> ≥70 to <90%, N                    | 53                           | 46                   | 63                      | 57                   |
| Participants with at least one respiratory AE, n (%) | 8 (15.1%)                    | 5 (10.9%)            | 9 (14.3%)               | 13 (22.8%)           |
| ppFEV <sub>1</sub> ≥90 to <100%, N                   | 33                           | 45                   | 51                      | 53                   |
| Participants with at least one respiratory AE, n (%) | 5 (15.2%)                    | 12 (26.7%)           | 7 (13.7%)               | 10 (18.9%)           |
| ppFEV <sub>1</sub> ≥100%, N                          | 89                           | 79                   | 109                     | 109                  |
| Participants with at least one respiratory AE, n (%) | 8 (9.0%)                     | 8 (10.1%)            | 7 (6.4%)                | 17 (15.6%)           |



**Figure S7.** Post-hoc descriptive display of baseline ppFEV<sub>1</sub> by 6-week change in ppFEV<sub>1</sub> by treatment arm and trial in the PP population.

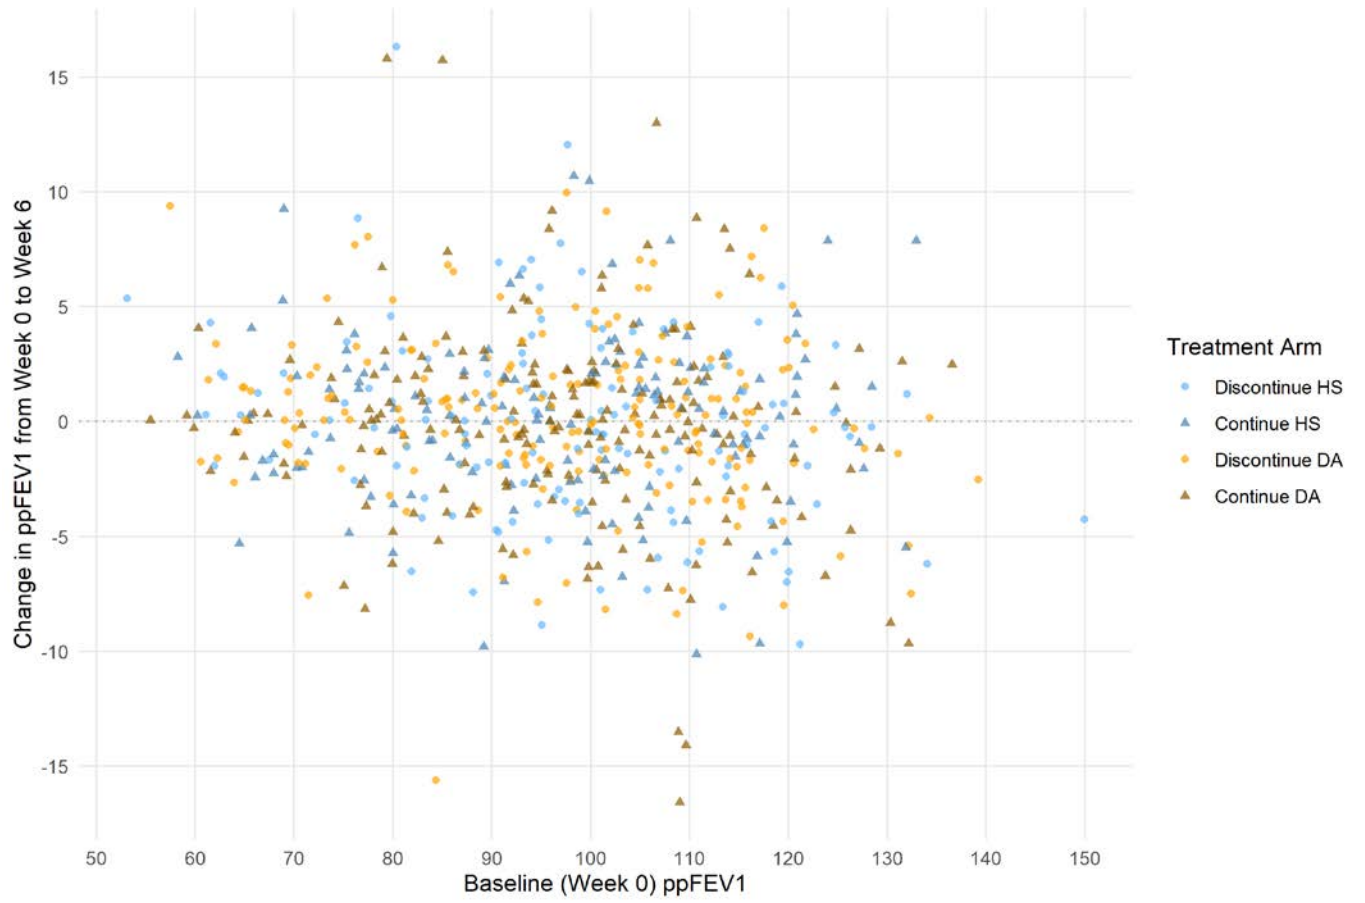

## References

1. Mayer-Hamblett N, Nichols DP, Odem-Davis K, et al. Evaluating the Impact of Stopping Chronic Therapies after Modulator Drug Therapy in Cystic Fibrosis: The SIMPLIFY Clinical Trial Study Design. *Annals of the American Thoracic Society* 2021; **18**(8): 1397-405.
2. Wyler F, Oestreich MA, Frauchiger BS, Ramsey KA, Latzin P. Correction of sensor crosstalk error in Exhalyzer D multiple-breath washout device significantly impacts outcomes in children with cystic fibrosis. *J Appl Physiol (1985)* 2021; **131**(3): 1148-56.
3. Saunders C, Jensen R, Robinson PD, et al. Integrating the multiple breath washout test into international multicentre trials. *Journal of cystic fibrosis : official journal of the European Cystic Fibrosis Society* 2020; **19**(4): 602-7.
4. Fleming TR, Odem-Davis K, Rothmann MD, Li Shen Y. Some essential considerations in the design and conduct of non-inferiority trials. *Clinical trials* 2011; **8**(4): 432-9.
5. Mehrotra DV, Liu F, Permutt T. Missing data in clinical trials: control-based mean imputation and sensitivity analysis. *Pharmaceutical statistics* 2017; **16**(5): 378-92.
6. R Development Core Team. R: A language and environment for statistical computing. Vienna, Austria: R Foundation for Statistical Computing; 2021.
